# Supplementary material
Source: MDPI journal article supplement (https://www.mdpi.com/2073-4352/13/5/788)

\*\*\* Basic Data Process \*\*\*

Group : 29-12-2021  
Data : Dr-abdelhamed-Sameh-1

# Strongest 3 peaks

| no. | peak | 2Theta  | d       | I/I1 | FWHM    | Intensity | Integrated Int |
|-----|------|---------|---------|------|---------|-----------|----------------|
|     | no.  | (deg)   | (Å)     |      | (deg)   | (Counts)  | (Counts)       |
| 1   | 51   | 26.3666 | 3.37751 | 100  | 0.38670 | 33        | 717            |
| 2   | 50   | 25.8200 | 3.44776 | 33   | 0.18000 | 11        | 171            |
| 3   | 52   | 26.7800 | 3.32631 | 33   | 0.16000 | 11        | 163            |

# Peak Data List

| peak<br>no. | 2Theta<br>(deg) | d<br>(A) | I/I1 | FWHM<br>(deg) | Intensity<br>(Counts) | Integrated Int<br>(Counts) |
|-------------|-----------------|----------|------|---------------|-----------------------|----------------------------|
| 1           | 5.0850          | 17.36457 | 9    | 0.07000       | 3                     | 16                         |
| 2           | 5.3750          | 16.42833 | 9    | 0.03000       | 3                     | 7                          |
| 3           | 5.6800          | 15.54684 | 15   | 0.08000       | 5                     | 33                         |
| 4           | 6.5800          | 13.42225 | 21   | 0.16000       | 7                     | 118                        |
| 5           | 7.1100          | 12.42286 | 24   | 0.18000       | 8                     | 110                        |
| 6           | 7.6600          | 11.53207 | 15   | 0.04000       | 5                     | 26                         |
| 7           | 7.9766          | 11.07504 | 15   | 0.08670       | 5                     | 25                         |
| 8           | 8.4400          | 10.46798 | 3    | 0.00000       | 1                     | 0                          |
| 9           | 8.7400          | 10.10933 | 6    | 0.04000       | 2                     | 5                          |
| 10          | 9.0100          | 9.80698  | 12   | 0.06000       | 4                     | 25                         |
| 11          | 9.3400          | 9.46121  | 3    | 0.00000       | 1                     | 0                          |
| 12          | 9.6450          | 9.16269  | 12   | 0.05000       | 4                     | 18                         |
| 13          | 10.3467         | 8.54281  | 15   | 0.08000       | 5                     | 32                         |
| 14          | 10.8250         | 8.16640  | 12   | 0.17000       | 4                     | 48                         |
| 15          | 11.3600         | 7.78298  | 15   | 0.08000       | 5                     | 41                         |
| 16          | 11.7600         | 7.51913  | 18   | 0.08000       | 6                     | 52                         |
| 17          | 11.9900         | 7.37541  | 15   | 0.06000       | 5                     | 38                         |
| 18          | 12.4300         | 7.11530  | 24   | 0.14000       | 8                     | 69                         |
| 19          | 13.0300         | 6.78898  | 15   | 0.10000       | 5                     | 49                         |
| 20          | 13.4500         | 6.57791  | 24   | 0.10000       | 8                     | 54                         |
| 21          | 13.9000         | 6.36595  | 18   | 0.20000       | 6                     | 71                         |
| 22          | 14.2400         | 6.21471  | 24   | 0.16000       | 8                     | 79                         |
| 23          | 14.5025         | 6.10281  | 18   | 0.11500       | 6                     | 53                         |
| 24          | 14.9100         | 5.93692  | 18   | 0.10000       | 6                     | 54                         |
| 25          | 15.1800         | 5.83192  | 18   | 0.08000       | 6                     | 49                         |
| 26          | 15.7200         | 5.63278  | 9    | 0.06000       | 3                     | 16                         |
| 27          | 16.4000         | 5.40073  | 9    | 0.08000       | 3                     | 31                         |
| 28          | 16.8700         | 5.25131  | 12   | 0.06000       | 4                     | 28                         |
| 29          | 17.1550         | 5.16470  | 15   | 0.07000       | 5                     | 36                         |
| 30          | 17.8133         | 4.97529  | 12   | 0.06670       | 4                     | 27                         |
| 31          | 18.0866         | 4.90072  | 12   | 0.09330       | 4                     | 30                         |
| 32          | 18.3933         | 4.81969  | 15   | 0.09330       | 5                     | 41                         |
| 33          | 18.7450         | 4.73005  | 12   | 0.07000       | 4                     | 15                         |
| 34          | 19.3200         | 4.59055  | 15   | 0.08000       | 5                     | 49                         |
| 35          | 19.6050         | 4.52446  | 12   | 0.05000       | 4                     | 17                         |
| 36          | 19.8750         | 4.46360  | 9    | 0.05000       | 3                     | 23                         |
| 37          | 20.4850         | 4.33204  | 6    | 0.03000       | 2                     | 7                          |
| 38          | 21.0450         | 4.21801  | 9    | 0.03000       | 3                     | 14                         |
| 39          | 21.4666         | 4.13611  | 18   | 0.06670       | 6                     | 40                         |
| 40          | 21.7825         | 4.07684  | 21   | 0.06500       | 7                     | 40                         |
| 41          | 22.0900         | 4.02078  | 21   | 0.10000       | 7                     | 76                         |
| 42          | 22.5900         | 3.93290  | 21   | 0.22000       | 7                     | 115                        |
| 43          | 23.0200         | 3.86040  | 15   | 0.06000       | 5                     | 23                         |
| 44          | 23.4350         | 3.79297  | 15   | 0.05000       | 5                     | 24                         |
| 45          | 23.5700         | 3.77155  | 15   | 0.06000       | 5                     | 34                         |
| 46          | 24.0250         | 3.70114  | 6    | 0.05000       | 2                     | 7                          |
| 47          | 24.4283         | 3.64094  | 27   | 0.12330       | 9                     | 70                         |
| 48          | 24.9566         | 3.56505  | 15   | 0.19330       | 5                     | 91                         |
| 49          | 25.2600         | 3.52291  | 12   | 0.00000       | 4                     | 0                          |

| peak<br>no. | 2Theta<br>(deg) | d<br>(Å) | I/I1 | FWHM<br>(deg) | Intensity<br>(Counts) | Integrated Int<br>(Counts) |
|-------------|-----------------|----------|------|---------------|-----------------------|----------------------------|
| 50          | 25.8200         | 3.44776  | 33   | 0.18000       | 11                    | 171                        |
| 51          | 26.3666         | 3.37751  | 100  | 0.38670       | 33                    | 717                        |
| 52          | 26.7800         | 3.32631  | 33   | 0.16000       | 11                    | 163                        |
| 53          | 27.2000         | 3.27589  | 9    | 0.04000       | 3                     | 15                         |
| 54          | 27.4516         | 3.24644  | 12   | 0.08330       | 4                     | 21                         |
| 55          | 27.9850         | 3.18576  | 21   | 0.07000       | 7                     | 36                         |
| 56          | 28.2133         | 3.16050  | 12   | 0.09330       | 4                     | 33                         |
| 57          | 29.0725         | 3.06902  | 21   | 0.11500       | 7                     | 67                         |
| 58          | 29.4050         | 3.03507  | 27   | 0.09000       | 9                     | 79                         |
| 59          | 29.9516         | 2.98091  | 18   | 0.08330       | 6                     | 38                         |
| 60          | 30.5350         | 2.92527  | 21   | 0.09000       | 7                     | 36                         |
| 61          | 30.8833         | 2.89307  | 30   | 0.20670       | 10                    | 104                        |
| 62          | 31.4700         | 2.84046  | 24   | 0.26000       | 8                     | 110                        |
| 63          | 31.8550         | 2.80700  | 27   | 0.19000       | 9                     | 122                        |
| 64          | 32.3550         | 2.76476  | 12   | 0.13000       | 4                     | 30                         |
| 65          | 32.6800         | 2.73800  | 9    | 0.04000       | 3                     | 12                         |
| 66          | 33.1350         | 2.70144  | 6    | 0.07000       | 2                     | 9                          |
| 67          | 33.4500         | 2.67671  | 18   | 0.14000       | 6                     | 45                         |
| 68          | 34.0716         | 2.62929  | 18   | 0.12330       | 6                     | 48                         |
| 69          | 34.4300         | 2.60273  | 18   | 0.06000       | 6                     | 43                         |
| 70          | 35.0366         | 2.55905  | 27   | 0.15330       | 9                     | 85                         |
| 71          | 35.5000         | 2.52670  | 21   | 0.12000       | 7                     | 43                         |
| 72          | 35.8066         | 2.50576  | 21   | 0.14670       | 7                     | 67                         |
| 73          | 36.2766         | 2.47437  | 18   | 0.16670       | 6                     | 50                         |
| 74          | 36.5500         | 2.45648  | 12   | 0.14000       | 4                     | 57                         |
| 75          | 37.2250         | 2.41348  | 15   | 0.09000       | 5                     | 30                         |
| 76          | 37.8250         | 2.37656  | 9    | 0.03000       | 3                     | 20                         |
| 77          | 38.1200         | 2.35885  | 9    | 0.04000       | 3                     | 34                         |
| 78          | 38.4050         | 2.34199  | 9    | 0.05000       | 3                     | 22                         |
| 79          | 38.9600         | 2.30990  | 9    | 0.04000       | 3                     | 20                         |
| 80          | 39.7000         | 2.26853  | 9    | 0.04000       | 3                     | 25                         |
| 81          | 39.9800         | 2.25329  | 15   | 0.04000       | 5                     | 22                         |
| 82          | 40.5050         | 2.22528  | 9    | 0.05000       | 3                     | 15                         |
| 83          | 40.8000         | 2.20987  | 9    | 0.04000       | 3                     | 20                         |
| 84          | 41.4200         | 2.17822  | 3    | 0.00000       | 1                     | 0                          |
| 85          | 41.8400         | 2.15732  | 12   | 0.12000       | 4                     | 25                         |
| 86          | 42.0800         | 2.14557  | 6    | 0.12000       | 2                     | 13                         |
| 87          | 42.5800         | 2.12152  | 3    | 0.00000       | 1                     | 0                          |
| 88          | 42.9983         | 2.10185  | 15   | 0.09670       | 5                     | 28                         |
| 89          | 43.4200         | 2.08240  | 15   | 0.12000       | 5                     | 46                         |
| 90          | 43.8200         | 2.06432  | 21   | 0.28000       | 7                     | 139                        |
| 91          | 44.4500         | 2.03651  | 9    | 0.06000       | 3                     | 25                         |
| 92          | 45.0500         | 2.01077  | 9    | 0.06000       | 3                     | 23                         |
| 93          | 45.5850         | 1.98841  | 6    | 0.03000       | 2                     | 4                          |
| 94          | 46.0900         | 1.96779  | 12   | 0.14000       | 4                     | 36                         |
| 95          | 46.6200         | 1.94665  | 6    | 0.04000       | 2                     | 7                          |
| 96          | 46.9300         | 1.93451  | 12   | 0.10000       | 4                     | 30                         |
| 97          | 47.2400         | 1.92254  | 9    | 0.04000       | 3                     | 20                         |
| 98          | 47.6500         | 1.90695  | 6    | 0.10000       | 2                     | 17                         |
| 99          | 47.9650         | 1.89515  | 12   | 0.11000       | 4                     | 34                         |
| 100         | 48.2600         | 1.88426  | 15   | 0.08000       | 5                     | 56                         |
| 101         | 48.7800         | 1.86538  | 3    | 0.00000       | 1                     | 0                          |
| 102         | 49.1000         | 1.85397  | 9    | 0.08000       | 3                     | 16                         |
| 103         | 49.6100         | 1.83610  | 18   | 0.10000       | 6                     | 55                         |
| 104         | 49.9400         | 1.82473  | 9    | 0.04000       | 3                     | 23                         |
| 105         | 50.2700         | 1.81353  | 18   | 0.10000       | 6                     | 39                         |
| 106         | 50.5350         | 1.80464  | 12   | 0.09000       | 4                     | 16                         |
| 107         | 51.0350         | 1.78812  | 24   | 0.19000       | 8                     | 75                         |
| 108         | 51.4750         | 1.77387  | 21   | 0.19000       | 7                     | 84                         |
| 109         | 51.8550         | 1.76176  | 27   | 0.19000       | 9                     | 136                        |
| 110         | 52.2400         | 1.74968  | 9    | 0.00000       | 3                     | 0                          |
| 111         | 52.4400         | 1.74347  | 18   | 0.16000       | 6                     | 110                        |

| peak<br>no. | 2Theta<br>(deg) | d<br>(Å) | I/I1 | FWHM<br>(deg) | Intensity<br>(Counts) | Integrated Int<br>(Counts) |
|-------------|-----------------|----------|------|---------------|-----------------------|----------------------------|
| 112         | 52.9900         | 1.72667  | 15   | 0.10000       | 5                     | 31                         |
| 113         | 53.3183         | 1.71681  | 27   | 0.13670       | 9                     | 75                         |
| 114         | 53.7433         | 1.70423  | 9    | 0.04670       | 3                     | 15                         |
| 115         | 54.0700         | 1.69470  | 6    | 0.06000       | 2                     | 12                         |
| 116         | 54.4400         | 1.68405  | 18   | 0.16000       | 6                     | 46                         |
| 117         | 54.7600         | 1.67497  | 12   | 0.16000       | 4                     | 39                         |
| 118         | 55.0600         | 1.66655  | 3    | 0.00000       | 1                     | 0                          |
| 119         | 55.3050         | 1.65974  | 6    | 0.05000       | 2                     | 5                          |
| 120         | 55.6000         | 1.65163  | 9    | 0.04000       | 3                     | 20                         |
| 121         | 56.2500         | 1.63408  | 6    | 0.08000       | 2                     | 11                         |
| 122         | 56.5200         | 1.62691  | 3    | 0.00000       | 1                     | 0                          |
| 123         | 57.0800         | 1.61227  | 15   | 0.08000       | 5                     | 39                         |
| 124         | 58.2200         | 1.58339  | 6    | 0.04000       | 2                     | 10                         |
| 125         | 58.4950         | 1.57660  | 9    | 0.05000       | 3                     | 14                         |
| 126         | 58.7500         | 1.57036  | 9    | 0.14000       | 3                     | 31                         |
| 127         | 59.1200         | 1.56141  | 3    | 0.00000       | 1                     | 0                          |
| 128         | 59.4600         | 1.55330  | 12   | 0.16000       | 4                     | 42                         |
| 129         | 60.0000         | 1.54060  | 6    | 0.02000       | 2                     | 2                          |
| 130         | 60.3600         | 1.53227  | 3    | 0.00000       | 1                     | 0                          |
| 131         | 60.7200         | 1.52404  | 6    | 0.08000       | 2                     | 12                         |
| 132         | 61.4050         | 1.50868  | 9    | 0.05000       | 3                     | 16                         |
| 133         | 61.8850         | 1.49812  | 15   | 0.09000       | 5                     | 47                         |
| 134         | 62.1800         | 1.49172  | 6    | 0.00000       | 2                     | 0                          |
| 135         | 62.5500         | 1.48378  | 12   | 0.06000       | 4                     | 24                         |
| 136         | 62.8650         | 1.47710  | 12   | 0.09000       | 4                     | 21                         |
| 137         | 63.1900         | 1.47029  | 15   | 0.14000       | 5                     | 39                         |
| 138         | 63.5183         | 1.46348  | 12   | 0.13670       | 4                     | 38                         |
| 139         | 63.8200         | 1.45728  | 6    | 0.04000       | 2                     | 8                          |
| 140         | 64.3500         | 1.44655  | 9    | 0.06000       | 3                     | 32                         |
| 141         | 64.8600         | 1.43641  | 12   | 0.12000       | 4                     | 32                         |
| 142         | 65.4700         | 1.42449  | 12   | 0.10000       | 4                     | 41                         |
| 143         | 65.9200         | 1.41585  | 3    | 0.00000       | 1                     | 0                          |
| 144         | 66.2250         | 1.41007  | 6    | 0.03000       | 2                     | 7                          |
| 145         | 66.8800         | 1.39784  | 6    | 0.04000       | 2                     | 5                          |
| 146         | 67.1300         | 1.39324  | 6    | 0.06000       | 2                     | 16                         |
| 147         | 67.6600         | 1.38361  | 3    | 0.00000       | 1                     | 0                          |
| 148         | 68.8400         | 1.36275  | 15   | 0.12000       | 5                     | 40                         |
| 149         | 69.3700         | 1.35363  | 12   | 0.14000       | 4                     | 43                         |
| 150         | 69.6700         | 1.34853  | 6    | 0.10000       | 2                     | 14                         |
| 151         | 69.9950         | 1.34306  | 9    | 0.13000       | 3                     | 23                         |
| 152         | 70.4000         | 1.33632  | 3    | 0.00000       | 1                     | 0                          |
| 153         | 70.7950         | 1.32983  | 15   | 0.19000       | 5                     | 60                         |
| 154         | 71.2800         | 1.32197  | 9    | 0.04000       | 3                     | 23                         |
| 155         | 72.0000         | 1.31051  | 12   | 0.12000       | 4                     | 31                         |
| 156         | 72.4600         | 1.30332  | 18   | 0.16000       | 6                     | 53                         |
| 157         | 72.8150         | 1.29784  | 9    | 0.03000       | 3                     | 10                         |
| 158         | 73.1200         | 1.29318  | 6    | 0.04000       | 2                     | 9                          |
| 159         | 73.4200         | 1.28863  | 3    | 0.00000       | 1                     | 0                          |
| 160         | 73.8400         | 1.28234  | 6    | 0.04000       | 2                     | 6                          |
| 161         | 74.2400         | 1.27642  | 12   | 0.12000       | 4                     | 32                         |
| 162         | 74.6850         | 1.26991  | 6    | 0.05000       | 2                     | 5                          |
| 163         | 75.4100         | 1.25949  | 9    | 0.10000       | 3                     | 43                         |
| 164         | 75.8600         | 1.25314  | 9    | 0.04000       | 3                     | 18                         |
| 165         | 76.2900         | 1.24714  | 9    | 0.06000       | 3                     | 25                         |
| 166         | 76.8500         | 1.23944  | 9    | 0.06000       | 3                     | 19                         |
| 167         | 77.2700         | 1.23375  | 6    | 0.10000       | 2                     | 12                         |
| 168         | 77.5400         | 1.23013  | 3    | 0.00000       | 1                     | 0                          |
| 169         | 77.9950         | 1.22408  | 6    | 0.09000       | 2                     | 20                         |
| 170         | 78.3550         | 1.21936  | 9    | 0.05000       | 3                     | 22                         |
| 171         | 79.1400         | 1.20922  | 9    | 0.04000       | 3                     | 14                         |

\*\*\* Basic Data Process \*\*\*

# Data Infomation

Group : 29-12-2021  
Data : Dr-abdelhamed-Sameh-1  
Sample Nmae : Dr-abdelhamed-Sameh-  
Comment :  
Date & Time : 12-29-21 11:00:28

# Measurement Condition

X-ray tube  
target : Cu  
voltage : 40.0 (kV)  
current : 30.0 (mA)  
Slits  
Auto Slit : not Used  
divergence slit : 1.00000 (deg)  
scatter slit : 1.00000 (deg)  
receiving slit : 0.30000 (mm)  
Scanning  
drive axis : Theta-2Theta  
scan range : 5.0000 - 80.0000 (deg)  
scan mode : Continuous Scan  
scan speed : 8.0000 (deg/min)  
sampling pitch : 0.0200 (deg)  
preset time : 0.15 (sec)

# Data Process Condition

Smoothing [ MANUAL ]  
smoothing points : 17  
B.G.Subtruction [ MANUAL ]  
sampling points : 19  
repeat times : 30  
Ka1-a2 Separate [ MANUAL ]  
Ka1 a2 ratio : 50 (%)  
Peak Search [ AUTO ]  
differential points : 21  
FWHM threshold : 0.050 (deg)  
intensity threshold : 30 (par mil)  
FWHM ratio (n-1)/n : 2  
System error Correction [ NO ]  
Precise peak Correction [ NO ]



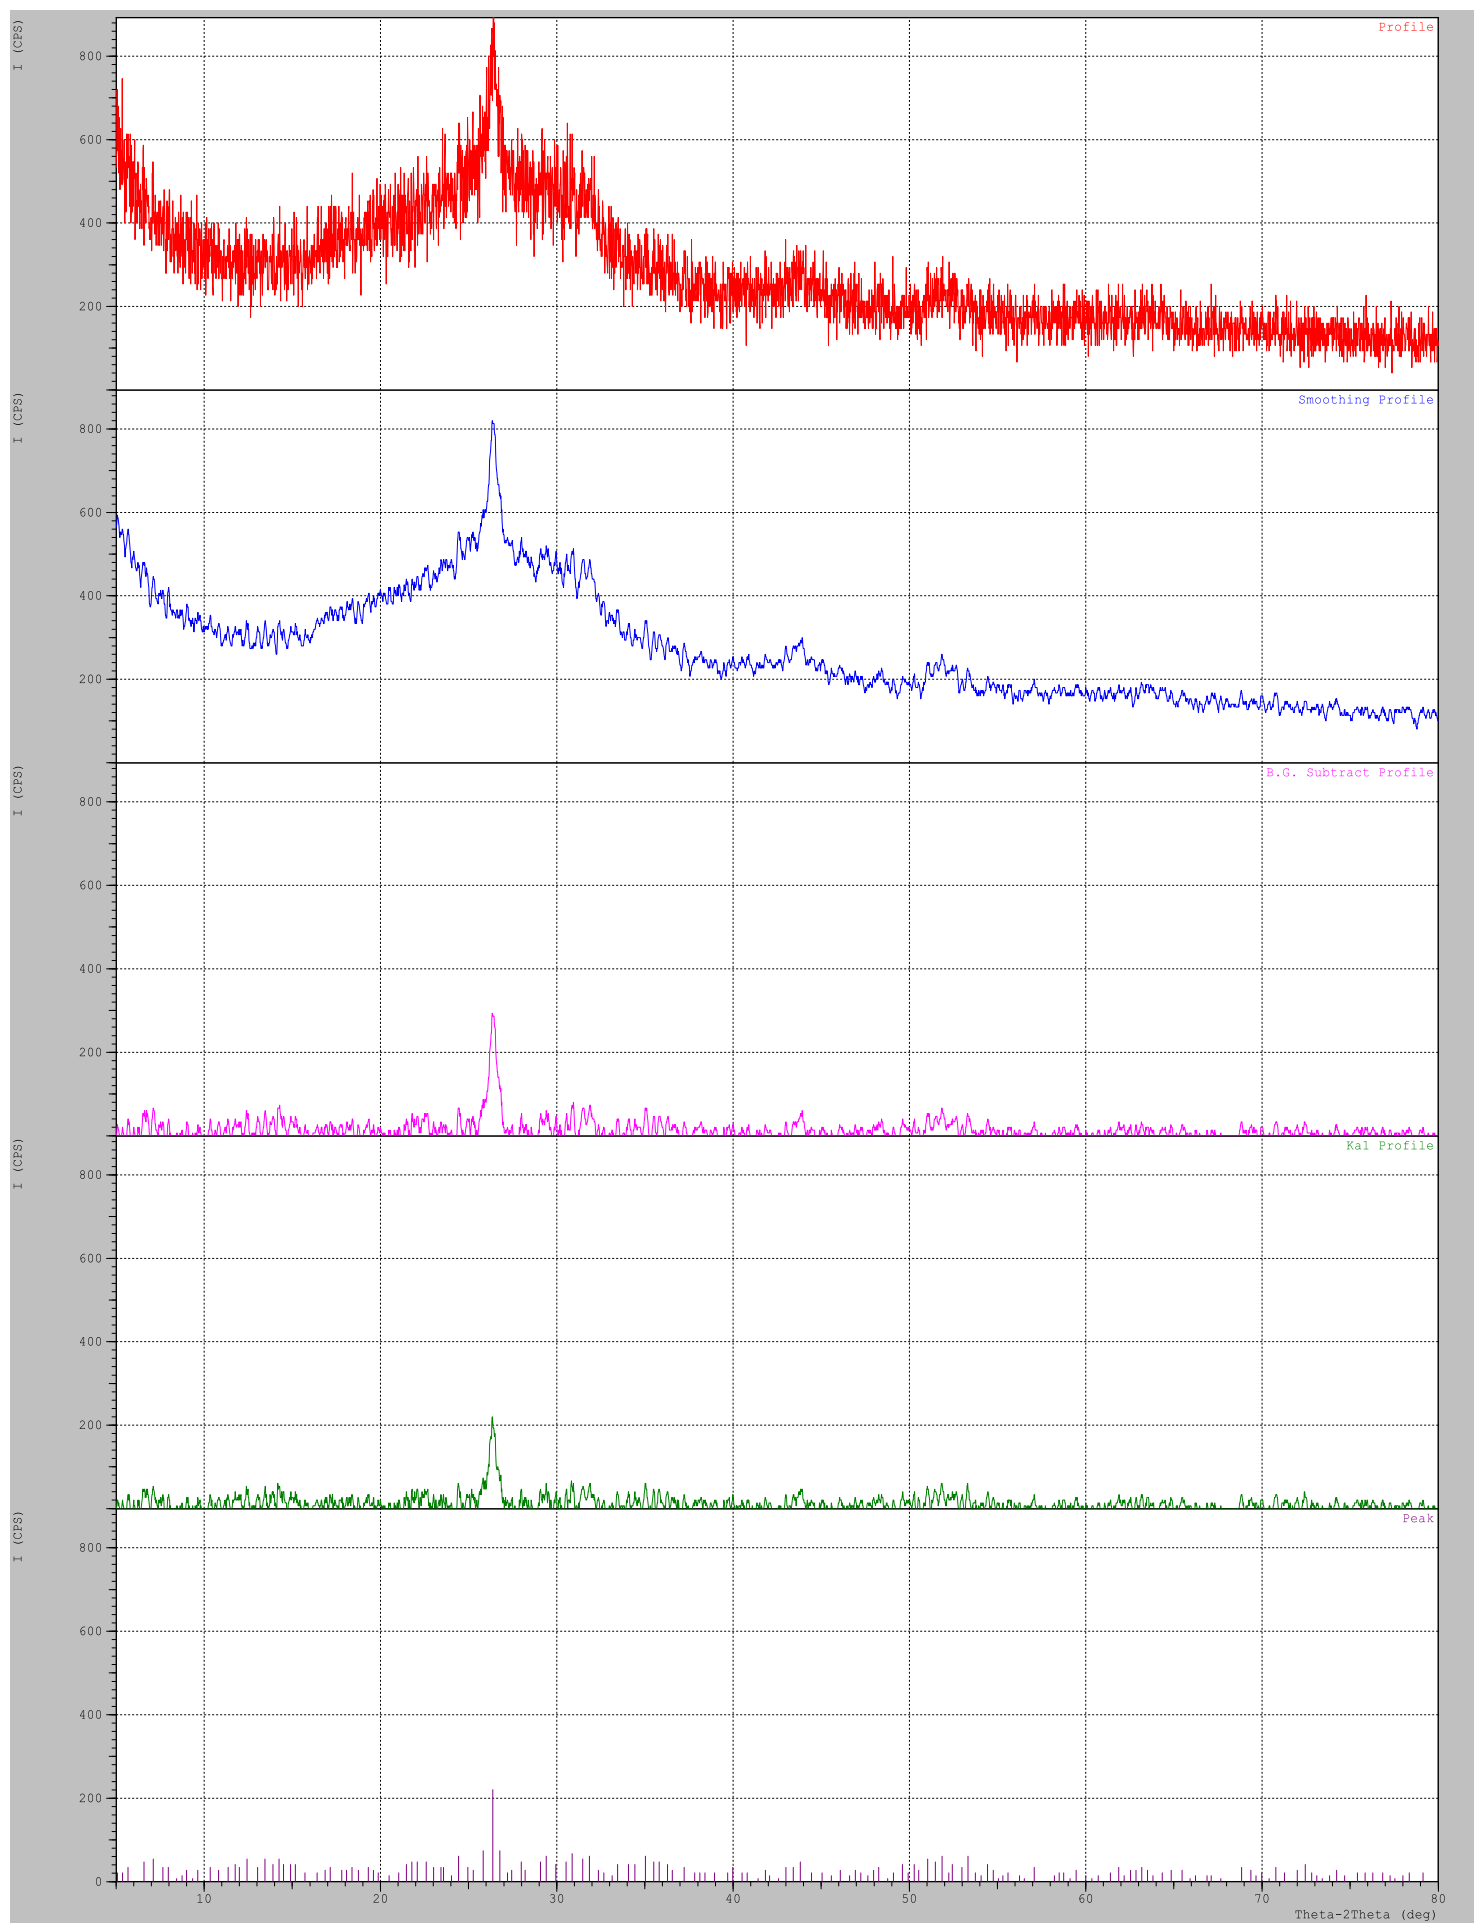

\*\*\* Basic Data Process \*\*\*

Group : 29-12-2021  
Data : Dr-abdelhamed-Sameh-2

# Strongest 3 peaks

| no. | peak no. | 2Theta (deg) | d (A)   | I/I1 | FWHM (deg) | Intensity (Counts) | Integrated Int (Counts) |
|-----|----------|--------------|---------|------|------------|--------------------|-------------------------|
| 1   | 38       | 26.3925      | 3.37426 | 100  | 0.54500    | 40                 | 1084                    |
| 2   | 37       | 25.6700      | 3.46757 | 43   | 0.18000    | 17                 | 158                     |
| 3   | 35       | 24.6666      | 3.60630 | 30   | 0.17330    | 12                 | 185                     |

# Peak Data List

| peak no. | 2Theta (deg) | d (A)    | I/I1 | FWHM (deg) | Intensity (Counts) | Integrated Int (Counts) |
|----------|--------------|----------|------|------------|--------------------|-------------------------|
| 1        | 5.1800       | 17.04632 | 8    | 0.02000    | 3                  | 4                       |
| 2        | 5.9200       | 14.91709 | 13   | 0.10660    | 5                  | 40                      |
| 3        | 6.5000       | 13.58727 | 8    | 0.04000    | 3                  | 7                       |
| 4        | 7.0600       | 12.51073 | 5    | 0.02000    | 2                  | 2                       |
| 5        | 7.6200       | 11.59252 | 15   | 0.00000    | 6                  | 0                       |
| 6        | 8.2550       | 10.70215 | 15   | 0.11000    | 6                  | 54                      |
| 7        | 8.7450       | 10.10356 | 8    | 0.03000    | 3                  | 20                      |
| 8        | 9.2733       | 9.52911  | 18   | 0.14670    | 7                  | 58                      |
| 9        | 10.1900      | 8.67383  | 10   | 0.06000    | 4                  | 40                      |
| 10       | 11.0533      | 7.99824  | 13   | 0.10670    | 5                  | 43                      |
| 11       | 11.5150      | 7.67856  | 5    | 0.05000    | 2                  | 13                      |
| 12       | 11.9900      | 7.37541  | 18   | 0.06000    | 7                  | 44                      |
| 13       | 12.4050      | 7.12959  | 20   | 0.13000    | 8                  | 63                      |
| 14       | 12.9716      | 6.81941  | 20   | 0.16330    | 8                  | 104                     |
| 15       | 13.5100      | 6.54883  | 15   | 0.10000    | 6                  | 78                      |
| 16       | 14.1750      | 6.24306  | 13   | 0.05000    | 5                  | 36                      |
| 17       | 14.6050      | 6.06021  | 10   | 0.05000    | 4                  | 20                      |
| 18       | 15.0700      | 5.87424  | 15   | 0.14000    | 6                  | 81                      |
| 19       | 15.9200      | 5.56247  | 8    | 0.04000    | 3                  | 17                      |
| 20       | 16.4400      | 5.38768  | 3    | 0.00000    | 1                  | 0                       |
| 21       | 16.8033      | 5.27200  | 8    | 0.04670    | 3                  | 9                       |
| 22       | 17.3650      | 5.10271  | 18   | 0.17000    | 7                  | 79                      |
| 23       | 17.8316      | 4.97023  | 20   | 0.08330    | 8                  | 68                      |
| 24       | 18.5000      | 4.79213  | 3    | 0.00000    | 1                  | 0                       |
| 25       | 18.9750      | 4.67323  | 8    | 0.07000    | 3                  | 17                      |
| 26       | 19.6450      | 4.51533  | 10   | 0.07000    | 4                  | 24                      |
| 27       | 20.2183      | 4.38857  | 13   | 0.06330    | 5                  | 41                      |
| 28       | 21.2000      | 4.18752  | 18   | 0.14000    | 7                  | 145                     |
| 29       | 21.5800      | 4.11463  | 3    | 0.00000    | 1                  | 0                       |
| 30       | 21.9716      | 4.04218  | 18   | 0.08330    | 7                  | 48                      |
| 31       | 22.4400      | 3.95885  | 18   | 0.16000    | 7                  | 108                     |
| 32       | 22.9150      | 3.87785  | 13   | 0.07000    | 5                  | 32                      |
| 33       | 23.5300      | 3.77787  | 10   | 0.10000    | 4                  | 35                      |
| 34       | 24.1700      | 3.67926  | 18   | 0.10000    | 7                  | 72                      |
| 35       | 24.6666      | 3.60630  | 30   | 0.17330    | 12                 | 185                     |
| 36       | 25.3450      | 3.51129  | 25   | 0.19000    | 10                 | 124                     |
| 37       | 25.6700      | 3.46757  | 43   | 0.18000    | 17                 | 158                     |
| 38       | 26.3925      | 3.37426  | 100  | 0.54500    | 40                 | 1084                    |
| 39       | 27.0400      | 3.29491  | 18   | 0.08000    | 7                  | 72                      |
| 40       | 27.4050      | 3.25185  | 25   | 0.13000    | 10                 | 103                     |
| 41       | 28.1400      | 3.16856  | 23   | 0.18000    | 9                  | 97                      |
| 42       | 29.3067      | 3.04502  | 25   | 0.40000    | 10                 | 256                     |
| 43       | 30.1000      | 2.96655  | 3    | 0.00000    | 1                  | 0                       |
| 44       | 30.2400      | 2.95313  | 3    | 0.00000    | 1                  | 0                       |
| 45       | 30.9000      | 2.89155  | 5    | 0.04000    | 2                  | 21                      |
| 46       | 31.4800      | 2.83958  | 18   | 0.04000    | 7                  | 42                      |
| 47       | 31.9400      | 2.79973  | 15   | 0.16000    | 6                  | 115                     |
| 48       | 32.3933      | 2.76158  | 10   | 0.09330    | 4                  | 22                      |
| 49       | 32.9350      | 2.71738  | 8    | 0.03000    | 3                  | 10                      |

| peak<br>no. | 2Theta<br>(deg) | d<br>(Å) | I/I1 | FWHM<br>(deg) | Intensity<br>(Counts) | Integrated Int<br>(Counts) |
|-------------|-----------------|----------|------|---------------|-----------------------|----------------------------|
| 50          | 33.5700         | 2.66742  | 20   | 0.14000       | 8                     | 66                         |
| 51          | 33.9150         | 2.64107  | 10   | 0.11000       | 4                     | 25                         |
| 52          | 34.4000         | 2.60493  | 15   | 0.14000       | 6                     | 55                         |
| 53          | 35.1600         | 2.55035  | 15   | 0.16000       | 6                     | 72                         |
| 54          | 35.6200         | 2.51846  | 3    | 0.00000       | 1                     | 0                          |
| 55          | 36.0400         | 2.49007  | 13   | 0.08000       | 5                     | 32                         |
| 56          | 36.4350         | 2.46397  | 15   | 0.11000       | 6                     | 40                         |
| 57          | 36.8350         | 2.43813  | 13   | 0.15000       | 5                     | 53                         |
| 58          | 37.3200         | 2.40755  | 5    | 0.04000       | 2                     | 8                          |
| 59          | 37.7200         | 2.38293  | 3    | 0.00000       | 1                     | 0                          |
| 60          | 38.1600         | 2.35646  | 13   | 0.08000       | 5                     | 53                         |
| 61          | 38.8033         | 2.31887  | 18   | 0.11330       | 7                     | 57                         |
| 62          | 39.3566         | 2.28753  | 13   | 0.07330       | 5                     | 35                         |
| 63          | 39.9750         | 2.25356  | 18   | 0.13000       | 7                     | 102                        |
| 64          | 40.6100         | 2.21977  | 10   | 0.14000       | 4                     | 72                         |
| 65          | 41.3250         | 2.18300  | 13   | 0.09000       | 5                     | 55                         |
| 66          | 41.9766         | 2.15061  | 15   | 0.15330       | 6                     | 73                         |
| 67          | 42.5300         | 2.12390  | 15   | 0.14000       | 6                     | 56                         |
| 68          | 43.0800         | 2.09805  | 8    | 0.04000       | 3                     | 16                         |
| 69          | 43.5700         | 2.07558  | 18   | 0.26000       | 7                     | 111                        |
| 70          | 43.9600         | 2.05807  | 25   | 0.48000       | 10                    | 229                        |
| 71          | 44.7100         | 2.02527  | 5    | 0.06000       | 2                     | 14                         |
| 72          | 45.2000         | 2.00445  | 8    | 0.04000       | 3                     | 17                         |
| 73          | 45.6300         | 1.98655  | 10   | 0.12000       | 4                     | 37                         |
| 74          | 46.3550         | 1.95716  | 13   | 0.07000       | 5                     | 30                         |
| 75          | 46.8200         | 1.93880  | 5    | 0.02000       | 2                     | 2                          |
| 76          | 47.1950         | 1.92426  | 8    | 0.13000       | 3                     | 35                         |
| 77          | 47.7000         | 1.90506  | 18   | 0.12000       | 7                     | 57                         |
| 78          | 48.4150         | 1.87859  | 13   | 0.11000       | 5                     | 37                         |
| 79          | 48.5400         | 1.87404  | 3    | 0.00000       | 1                     | 0                          |
| 80          | 48.6950         | 1.86844  | 13   | 0.09000       | 5                     | 30                         |
| 81          | 49.2550         | 1.84850  | 8    | 0.15000       | 3                     | 33                         |
| 82          | 49.8350         | 1.82833  | 10   | 0.15000       | 4                     | 48                         |
| 83          | 50.8700         | 1.79354  | 8    | 0.10000       | 3                     | 27                         |
| 84          | 51.0750         | 1.78682  | 8    | 0.05000       | 3                     | 15                         |
| 85          | 51.6000         | 1.76986  | 20   | 0.44000       | 8                     | 180                        |
| 86          | 52.1558         | 1.75230  | 28   | 0.13830       | 11                    | 92                         |
| 87          | 53.2300         | 1.71945  | 10   | 0.06000       | 4                     | 25                         |
| 88          | 53.8800         | 1.70023  | 3    | 0.00000       | 1                     | 0                          |
| 89          | 54.2200         | 1.69037  | 5    | 0.08000       | 2                     | 22                         |
| 90          | 54.6550         | 1.67794  | 13   | 0.09000       | 5                     | 58                         |
| 91          | 55.3000         | 1.65988  | 10   | 0.16000       | 4                     | 49                         |
| 92          | 56.4650         | 1.62837  | 8    | 0.07000       | 3                     | 40                         |
| 93          | 56.9500         | 1.61565  | 8    | 0.06000       | 3                     | 16                         |
| 94          | 57.3600         | 1.60507  | 8    | 0.04000       | 3                     | 18                         |
| 95          | 58.1700         | 1.58463  | 8    | 0.06000       | 3                     | 26                         |
| 96          | 58.6200         | 1.57354  | 3    | 0.00000       | 1                     | 0                          |
| 97          | 59.0550         | 1.56298  | 5    | 0.03000       | 2                     | 3                          |
| 98          | 59.5700         | 1.55069  | 13   | 0.14000       | 5                     | 56                         |
| 99          | 60.2200         | 1.53550  | 3    | 0.00000       | 1                     | 0                          |
| 100         | 60.7400         | 1.52359  | 8    | 0.12000       | 3                     | 62                         |
| 101         | 61.3050         | 1.51090  | 8    | 0.03000       | 3                     | 15                         |
| 102         | 62.3550         | 1.48795  | 13   | 0.11000       | 5                     | 38                         |
| 103         | 62.9350         | 1.47563  | 18   | 0.17000       | 7                     | 91                         |
| 104         | 63.3700         | 1.46654  | 18   | 0.14000       | 7                     | 78                         |
| 105         | 63.8150         | 1.45738  | 8    | 0.03000       | 3                     | 7                          |
| 106         | 64.5200         | 1.44315  | 18   | 0.20000       | 7                     | 84                         |
| 107         | 64.9550         | 1.43454  | 10   | 0.11000       | 4                     | 32                         |
| 108         | 66.0000         | 1.41433  | 13   | 0.16000       | 5                     | 54                         |
| 109         | 66.5933         | 1.40316  | 18   | 0.18670       | 7                     | 86                         |
| 110         | 67.2200         | 1.39160  | 13   | 0.16000       | 5                     | 67                         |
| 111         | 67.6350         | 1.38406  | 10   | 0.19000       | 4                     | 54                         |

| peak<br>no. | 2Theta<br>(deg) | d<br>(Å) | I/I1 | FWHM<br>(deg) | Intensity<br>(Counts) | Integrated Int<br>(Counts) |
|-------------|-----------------|----------|------|---------------|-----------------------|----------------------------|
| 112         | 68.6600         | 1.36588  | 10   | 0.08000       | 4                     | 32                         |
| 113         | 69.0950         | 1.35834  | 8    | 0.05000       | 3                     | 19                         |
| 114         | 69.7500         | 1.34718  | 13   | 0.14000       | 5                     | 68                         |
| 115         | 70.2400         | 1.33897  | 3    | 0.00000       | 1                     | 0                          |
| 116         | 70.4800         | 1.33500  | 3    | 0.00000       | 1                     | 0                          |
| 117         | 71.3550         | 1.32077  | 8    | 0.09000       | 3                     | 30                         |
| 118         | 72.0050         | 1.31043  | 8    | 0.09000       | 3                     | 21                         |
| 119         | 72.8400         | 1.29746  | 13   | 0.16000       | 5                     | 58                         |
| 120         | 73.3200         | 1.29014  | 8    | 0.04000       | 3                     | 19                         |
| 121         | 73.7800         | 1.28323  | 3    | 0.00000       | 1                     | 0                          |
| 122         | 74.5650         | 1.27166  | 8    | 0.13000       | 3                     | 24                         |
| 123         | 74.9900         | 1.26550  | 5    | 0.06000       | 2                     | 10                         |
| 124         | 75.6200         | 1.25651  | 10   | 0.16000       | 4                     | 43                         |
| 125         | 76.2000         | 1.24839  | 10   | 0.12000       | 4                     | 30                         |
| 126         | 76.6800         | 1.24176  | 8    | 0.04000       | 3                     | 14                         |
| 127         | 77.3100         | 1.23321  | 10   | 0.14000       | 4                     | 54                         |
| 128         | 78.0200         | 1.22376  | 3    | 0.00000       | 1                     | 0                          |
| 129         | 78.5250         | 1.21715  | 13   | 0.07000       | 5                     | 46                         |
| 130         | 79.0400         | 1.21050  | 5    | 0.04000       | 2                     | 12                         |
| 131         | 79.6000         | 1.20339  | 13   | 0.12000       | 5                     | 52                         |

\*\*\* Basic Data Process \*\*\*

# Data Information

Group : 29-12-2021  
Data : Dr-abdelhamed-Sameh-2  
Sample Nmae : Dr-abdelhamed-Sameh2  
Comment :  
Date & Time : 12-29-21 11:26:54

# Measurement Condition

X-ray tube  
target : Cu  
voltage : 40.0 (kV)  
current : 30.0 (mA)  
Slits  
Auto Slit : not Used  
divergence slit : 1.00000 (deg)  
scatter slit : 1.00000 (deg)  
receiving slit : 0.30000 (mm)  
Scanning  
drive axis : Theta-2Theta  
scan range : 5.0000 - 80.0000 (deg)  
scan mode : Continuous Scan  
scan speed : 8.0000 (deg/min)  
sampling pitch : 0.0200 (deg)  
preset time : 0.15 (sec)

# Data Process Condition

Smoothing [ MANUAL ]  
smoothing points : 17  
B.G.Subtruction [ MANUAL ]  
sampling points : 19  
repeat times : 30  
Ka1-a2 Separate [ MANUAL ]  
Ka1 a2 ratio : 50 (%)  
Peak Search [ AUTO ]  
differential points : 29  
FWHM threshold : 0.050 (deg)  
intensity threshold : 30 (par mil)  
FWHM ratio (n-1)/n : 2  
System error Correction [ NO ]  
Precise peak Correction [ NO ]

< Group: 29-12-2021      Data: Dr-abdelhamed-Sameh-2    >

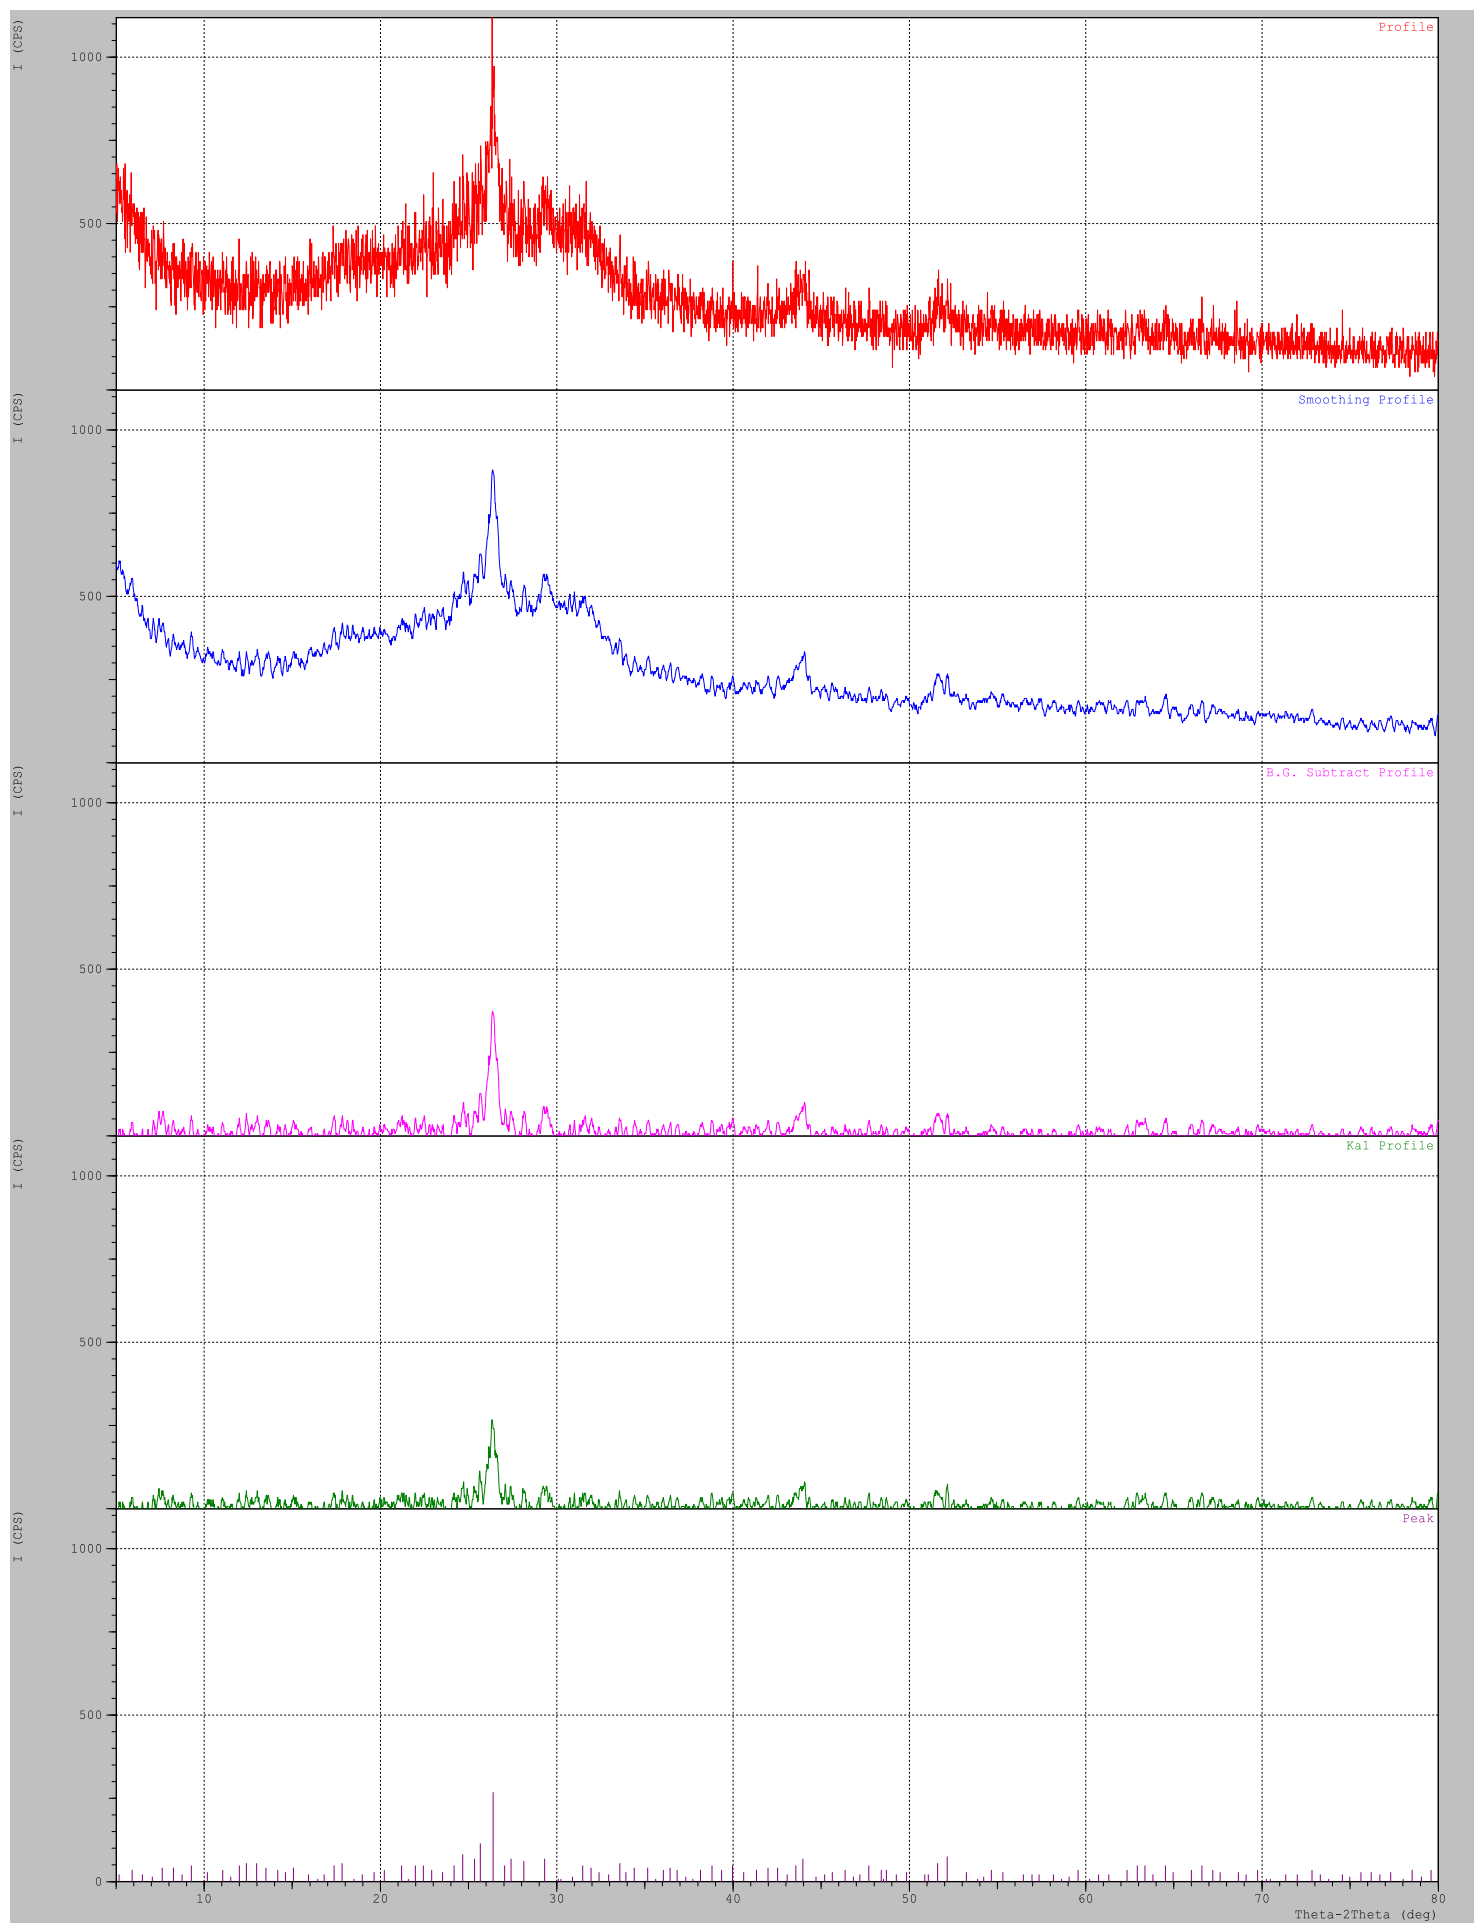

\*\*\* Basic Data Process \*\*\*

Group : 29-12-2021  
Data : Dr-abdelhamed-Sameh-3

# Strongest 3 peaks

| no. | peak no. | 2Theta (deg) | d (Å)    | I/I1 | FWHM (deg) | Intensity (Counts) | Integrated Int (Counts) |
|-----|----------|--------------|----------|------|------------|--------------------|-------------------------|
| 1   | 47       | 26.6333      | 3.34430  | 100  | 0.46670    | 14                 | 349                     |
| 2   | 6        | 7.4366       | 11.87799 | 86   | 0.12670    | 12                 | 97                      |
| 3   | 34       | 20.7566      | 4.27596  | 71   | 0.11330    | 10                 | 97                      |

# Peak Data List

| peak no. | 2Theta (deg) | d (Å)    | I/I1 | FWHM (deg) | Intensity (Counts) | Integrated Int (Counts) |
|----------|--------------|----------|------|------------|--------------------|-------------------------|
| 1        | 5.2400       | 16.85127 | 21   | 0.04000    | 3                  | 13                      |
| 2        | 5.6400       | 15.65701 | 1    | 0.00000    | 0                  | 0                       |
| 3        | 6.1250       | 14.41827 | 43   | 0.07000    | 6                  | 53                      |
| 4        | 6.5700       | 13.44266 | 36   | 0.06000    | 5                  | 48                      |
| 5        | 7.0550       | 12.51958 | 21   | 0.03000    | 3                  | 11                      |
| 6        | 7.4366       | 11.87799 | 86   | 0.12670    | 12                 | 97                      |
| 7        | 7.8400       | 11.26770 | 14   | 0.08000    | 2                  | 20                      |
| 8        | 8.4650       | 10.43712 | 43   | 0.21000    | 6                  | 92                      |
| 9        | 8.8600       | 9.97267  | 50   | 0.16000    | 7                  | 71                      |
| 10       | 9.5350       | 9.26815  | 50   | 0.09000    | 7                  | 92                      |
| 11       | 10.3750      | 8.51957  | 43   | 0.09000    | 6                  | 43                      |
| 12       | 10.7050      | 8.25767  | 50   | 0.19000    | 7                  | 126                     |
| 13       | 11.3400      | 7.79666  | 64   | 0.12000    | 9                  | 96                      |
| 14       | 11.8800      | 7.44345  | 29   | 0.06000    | 4                  | 30                      |
| 15       | 12.2200      | 7.23710  | 7    | 0.00000    | 1                  | 0                       |
| 16       | 12.5700      | 7.03637  | 29   | 0.14000    | 4                  | 32                      |
| 17       | 13.2800      | 6.66173  | 21   | 0.04000    | 3                  | 10                      |
| 18       | 14.0633      | 6.29240  | 29   | 0.11330    | 4                  | 24                      |
| 19       | 14.6600      | 6.03759  | 14   | 0.04000    | 2                  | 10                      |
| 20       | 14.7600      | 5.99691  | 7    | 0.00000    | 1                  | 0                       |
| 21       | 14.9550      | 5.91915  | 14   | 0.03000    | 2                  | 6                       |
| 22       | 15.3450      | 5.76958  | 64   | 0.07000    | 9                  | 56                      |
| 23       | 15.8566      | 5.58456  | 50   | 0.08670    | 7                  | 68                      |
| 24       | 16.2800      | 5.44027  | 21   | 0.00000    | 3                  | 0                       |
| 25       | 16.9400      | 5.22976  | 43   | 0.08000    | 6                  | 44                      |
| 26       | 17.3400      | 5.11001  | 21   | 0.04000    | 3                  | 32                      |
| 27       | 17.9675      | 4.93294  | 43   | 0.09500    | 6                  | 41                      |
| 28       | 18.4983      | 4.79257  | 29   | 0.06330    | 4                  | 26                      |
| 29       | 18.7400      | 4.73130  | 7    | 0.00000    | 1                  | 0                       |
| 30       | 19.1033      | 4.64213  | 43   | 0.07330    | 6                  | 36                      |
| 31       | 19.5200      | 4.54397  | 29   | 0.08000    | 4                  | 26                      |
| 32       | 19.9925      | 4.43763  | 57   | 0.16500    | 8                  | 87                      |
| 33       | 20.3550      | 4.35941  | 50   | 0.05000    | 7                  | 39                      |
| 34       | 20.7566      | 4.27596  | 71   | 0.11330    | 10                 | 97                      |
| 35       | 21.0666      | 4.21373  | 50   | 0.06670    | 7                  | 48                      |
| 36       | 21.5200      | 4.12597  | 50   | 0.16000    | 7                  | 76                      |
| 37       | 21.7900      | 4.07545  | 57   | 0.18000    | 8                  | 81                      |
| 38       | 22.2200      | 3.99755  | 1    | 0.00000    | 0                  | 0                       |
| 39       | 22.4400      | 3.95885  | 21   | 0.04000    | 3                  | 12                      |
| 40       | 22.5500      | 3.93979  | 43   | 0.10000    | 6                  | 71                      |
| 41       | 23.2800      | 3.81787  | 50   | 0.08000    | 7                  | 89                      |
| 42       | 23.7867      | 3.73768  | 43   | 0.12000    | 6                  | 65                      |
| 43       | 24.2650      | 3.66507  | 36   | 0.17000    | 5                  | 66                      |
| 44       | 24.7900      | 3.58863  | 57   | 0.10000    | 8                  | 64                      |
| 45       | 25.2100      | 3.52979  | 36   | 0.18000    | 5                  | 94                      |
| 46       | 25.6600      | 3.46890  | 1    | 0.00000    | 0                  | 0                       |
| 47       | 26.6333      | 3.34430  | 100  | 0.46670    | 14                 | 349                     |
| 48       | 27.1750      | 3.27885  | 57   | 0.13000    | 8                  | 50                      |
| 49       | 27.4400      | 3.24778  | 50   | 0.28000    | 7                  | 127                     |

| peak<br>no. | 2Theta<br>(deg) | d<br>(Å) | I/I1 | FWHM<br>(deg) | Intensity<br>(Counts) | Integrated Int<br>(Counts) |
|-------------|-----------------|----------|------|---------------|-----------------------|----------------------------|
| 50          | 28.2700         | 3.15429  | 43   | 0.12000       | 6                     | 52                         |
| 51          | 28.6400         | 3.11437  | 14   | 0.04000       | 2                     | 11                         |
| 52          | 29.3350         | 3.04215  | 43   | 0.11000       | 6                     | 61                         |
| 53          | 29.6400         | 3.01153  | 43   | 0.08000       | 6                     | 43                         |
| 54          | 30.0900         | 2.96751  | 43   | 0.10000       | 6                     | 37                         |
| 55          | 30.7900         | 2.90162  | 29   | 0.10000       | 4                     | 39                         |
| 56          | 31.0800         | 2.87521  | 21   | 0.02000       | 3                     | 10                         |
| 57          | 31.4233         | 2.84457  | 64   | 0.12670       | 9                     | 104                        |
| 58          | 31.9600         | 2.79802  | 50   | 0.04000       | 7                     | 32                         |
| 59          | 32.4250         | 2.75895  | 29   | 0.05000       | 4                     | 17                         |
| 60          | 32.8950         | 2.72059  | 43   | 0.13000       | 6                     | 54                         |
| 61          | 33.6400         | 2.66203  | 7    | 0.00000       | 1                     | 0                          |
| 62          | 33.9816         | 2.63604  | 29   | 0.10330       | 4                     | 29                         |
| 63          | 34.2866         | 2.61329  | 29   | 0.09330       | 4                     | 31                         |
| 64          | 34.8350         | 2.57339  | 57   | 0.17000       | 8                     | 103                        |
| 65          | 35.3600         | 2.53638  | 36   | 0.04000       | 5                     | 32                         |
| 66          | 35.8700         | 2.50148  | 21   | 0.06000       | 3                     | 19                         |
| 67          | 36.2300         | 2.47744  | 36   | 0.06000       | 5                     | 32                         |
| 68          | 36.7550         | 2.44325  | 29   | 0.09000       | 4                     | 29                         |
| 69          | 37.4950         | 2.39672  | 43   | 0.13000       | 6                     | 63                         |
| 70          | 37.8500         | 2.37505  | 21   | 0.06000       | 3                     | 27                         |
| 71          | 38.2700         | 2.34994  | 43   | 0.14000       | 6                     | 72                         |
| 72          | 38.8200         | 2.31791  | 36   | 0.08000       | 5                     | 46                         |
| 73          | 39.3600         | 2.28734  | 29   | 0.08000       | 4                     | 29                         |
| 74          | 39.7500         | 2.26579  | 29   | 0.06000       | 4                     | 26                         |
| 75          | 40.2650         | 2.23799  | 43   | 0.17000       | 6                     | 86                         |
| 76          | 41.0000         | 2.19955  | 50   | 0.10000       | 7                     | 46                         |
| 77          | 41.3000         | 2.18427  | 43   | 0.10660       | 6                     | 37                         |
| 78          | 41.6333         | 2.16755  | 29   | 0.06670       | 4                     | 22                         |
| 79          | 42.3500         | 2.13251  | 21   | 0.06000       | 3                     | 18                         |
| 80          | 43.1200         | 2.09619  | 36   | 0.12000       | 5                     | 39                         |
| 81          | 43.5200         | 2.07785  | 43   | 0.16000       | 6                     | 105                        |
| 82          | 44.6000         | 2.03001  | 7    | 0.00000       | 1                     | 0                          |
| 83          | 45.1850         | 2.00508  | 43   | 0.15000       | 6                     | 55                         |
| 84          | 45.8200         | 1.97876  | 36   | 0.08000       | 5                     | 33                         |
| 85          | 46.1800         | 1.96417  | 43   | 0.20000       | 6                     | 72                         |
| 86          | 46.9500         | 1.93373  | 50   | 0.22000       | 7                     | 126                        |
| 87          | 47.7500         | 1.90318  | 36   | 0.10000       | 5                     | 39                         |
| 88          | 48.0400         | 1.89237  | 14   | 0.02000       | 2                     | 11                         |
| 89          | 48.3500         | 1.88096  | 29   | 0.10000       | 4                     | 20                         |
| 90          | 48.7550         | 1.86628  | 29   | 0.21000       | 4                     | 50                         |
| 91          | 49.2450         | 1.84885  | 36   | 0.15000       | 5                     | 84                         |
| 92          | 49.8600         | 1.82747  | 7    | 0.00000       | 1                     | 0                          |
| 93          | 50.3333         | 1.81139  | 29   | 0.14670       | 4                     | 29                         |
| 94          | 50.6800         | 1.79981  | 29   | 0.12000       | 4                     | 28                         |
| 95          | 51.2400         | 1.78145  | 14   | 0.08000       | 2                     | 30                         |
| 96          | 51.4800         | 1.77371  | 1    | 0.00000       | 0                     | 0                          |
| 97          | 51.9000         | 1.76034  | 50   | 0.16000       | 7                     | 86                         |
| 98          | 52.4000         | 1.74471  | 21   | 0.04000       | 3                     | 15                         |
| 99          | 52.7200         | 1.73487  | 21   | 0.04000       | 3                     | 22                         |
| 100         | 53.2800         | 1.71795  | 21   | 0.04000       | 3                     | 15                         |
| 101         | 53.7400         | 1.70433  | 21   | 0.08000       | 3                     | 25                         |
| 102         | 54.4000         | 1.68520  | 7    | 0.00000       | 1                     | 0                          |
| 103         | 55.2700         | 1.66071  | 14   | 0.06000       | 2                     | 9                          |
| 104         | 55.6200         | 1.65109  | 14   | 0.08000       | 2                     | 14                         |
| 105         | 56.0000         | 1.64078  | 7    | 0.00000       | 1                     | 0                          |
| 106         | 56.3350         | 1.63182  | 29   | 0.07000       | 4                     | 19                         |
| 107         | 56.7200         | 1.62165  | 7    | 0.00000       | 1                     | 0                          |
| 108         | 57.1400         | 1.61072  | 21   | 0.04000       | 3                     | 16                         |
| 109         | 57.5850         | 1.59933  | 29   | 0.17000       | 4                     | 57                         |
| 110         | 57.9800         | 1.58937  | 1    | 0.00000       | 0                     | 0                          |
| 111         | 58.5400         | 1.57549  | 21   | 0.08000       | 3                     | 33                         |



| peak<br>no. | 2Theta<br>(deg) | d<br>(Å) | I/I1 | FWHM<br>(deg) | Intensity<br>(Counts) | Integrated Int<br>(Counts) |
|-------------|-----------------|----------|------|---------------|-----------------------|----------------------------|
| 112         | 59.0100         | 1.56406  | 21   | 0.10000       | 3                     | 29                         |
| 113         | 59.7900         | 1.54551  | 29   | 0.14000       | 4                     | 28                         |
| 114         | 60.1166         | 1.53789  | 29   | 0.08670       | 4                     | 18                         |
| 115         | 60.6650         | 1.52529  | 29   | 0.11000       | 4                     | 33                         |
| 116         | 61.0650         | 1.51626  | 21   | 0.03000       | 3                     | 22                         |
| 117         | 61.5400         | 1.50569  | 21   | 0.08000       | 3                     | 17                         |
| 118         | 61.9200         | 1.49736  | 1    | 0.00000       | 0                     | 0                          |
| 119         | 62.5450         | 1.48389  | 14   | 0.05000       | 2                     | 8                          |
| 120         | 62.8700         | 1.47700  | 14   | 0.06000       | 2                     | 7                          |
| 121         | 63.2200         | 1.46966  | 21   | 0.04000       | 3                     | 18                         |
| 122         | 63.7950         | 1.45779  | 21   | 0.03000       | 3                     | 7                          |
| 123         | 64.4700         | 1.44415  | 43   | 0.14000       | 6                     | 52                         |
| 124         | 65.2200         | 1.42935  | 36   | 0.12000       | 5                     | 45                         |
| 125         | 65.5800         | 1.42237  | 7    | 0.00000       | 1                     | 0                          |
| 126         | 65.8700         | 1.41681  | 14   | 0.06000       | 2                     | 17                         |
| 127         | 66.4300         | 1.40622  | 29   | 0.14000       | 4                     | 30                         |
| 128         | 66.9400         | 1.39674  | 29   | 0.12000       | 4                     | 29                         |
| 129         | 67.6650         | 1.38352  | 36   | 0.17000       | 5                     | 56                         |
| 130         | 68.1200         | 1.37539  | 7    | 0.00000       | 1                     | 0                          |
| 131         | 68.5000         | 1.36868  | 14   | 0.04000       | 2                     | 8                          |
| 132         | 69.1600         | 1.35722  | 7    | 0.00000       | 1                     | 0                          |
| 133         | 69.7100         | 1.34785  | 21   | 0.14000       | 3                     | 32                         |
| 134         | 70.2000         | 1.33964  | 14   | 0.16000       | 2                     | 19                         |
| 135         | 70.5200         | 1.33434  | 21   | 0.08000       | 3                     | 22                         |
| 136         | 71.1900         | 1.32342  | 29   | 0.18000       | 4                     | 35                         |
| 137         | 71.5650         | 1.31741  | 21   | 0.07000       | 3                     | 16                         |
| 138         | 72.2750         | 1.30620  | 21   | 0.05000       | 3                     | 11                         |
| 139         | 72.6000         | 1.30115  | 21   | 0.12000       | 3                     | 23                         |
| 140         | 73.4250         | 1.28856  | 50   | 0.17000       | 7                     | 72                         |
| 141         | 73.8950         | 1.28152  | 36   | 0.25000       | 5                     | 62                         |
| 142         | 74.3750         | 1.27443  | 43   | 0.17000       | 6                     | 45                         |
| 143         | 74.7600         | 1.26882  | 36   | 0.08000       | 5                     | 24                         |
| 144         | 75.1400         | 1.26335  | 1    | 0.00000       | 0                     | 0                          |
| 145         | 75.3800         | 1.25992  | 1    | 0.00000       | 0                     | 0                          |
| 146         | 76.2800         | 1.24728  | 1    | 0.00000       | 0                     | 0                          |
| 147         | 77.3000         | 1.23335  | 14   | 0.12000       | 2                     | 12                         |
| 148         | 78.5700         | 1.21656  | 29   | 0.10000       | 4                     | 63                         |
| 149         | 79.2050         | 1.20839  | 21   | 0.11000       | 3                     | 31                         |
| 150         | 79.6900         | 1.20225  | 14   | 0.06000       | 2                     | 17                         |

\*\*\* Basic Data Process \*\*\*

# Data Information

Group : 29-12-2021  
Data : Dr-abdelhamed-Sameh-3  
Sample Nmae : Dr-abdelhamed-Sameh3  
Comment :  
Date & Time : 12-29-21 11:53:07

# Measurement Condition

X-ray tube  
target : Cu  
voltage : 40.0 (kV)  
current : 30.0 (mA)  
Slits  
Auto Slit : not Used  
divergence slit : 1.00000 (deg)  
scatter slit : 1.00000 (deg)  
receiving slit : 0.30000 (mm)  
Scanning  
drive axis : Theta-2Theta  
scan range : 5.0000 - 80.0000 (deg)  
scan mode : Continuous Scan  
scan speed : 8.0000 (deg/min)  
sampling pitch : 0.0200 (deg)  
preset time : 0.15 (sec)

# Data Process Condition

Smoothing [ MANUAL ]  
smoothing points : 17  
B.G.Subtruction [ MANUAL ]  
sampling points : 19  
repeat times : 30  
Ka1-a2 Separate [ MANUAL ]  
Ka1 a2 ratio : 50 (%)  
Peak Search [ AUTO ]  
differential points : 25  
FWHM threshold : 0.050 (deg)  
intensity threshold : 30 (par mil)  
FWHM ratio (n-1)/n : 2  
System error Correction [ NO ]  
Precise peak Correction [ NO ]

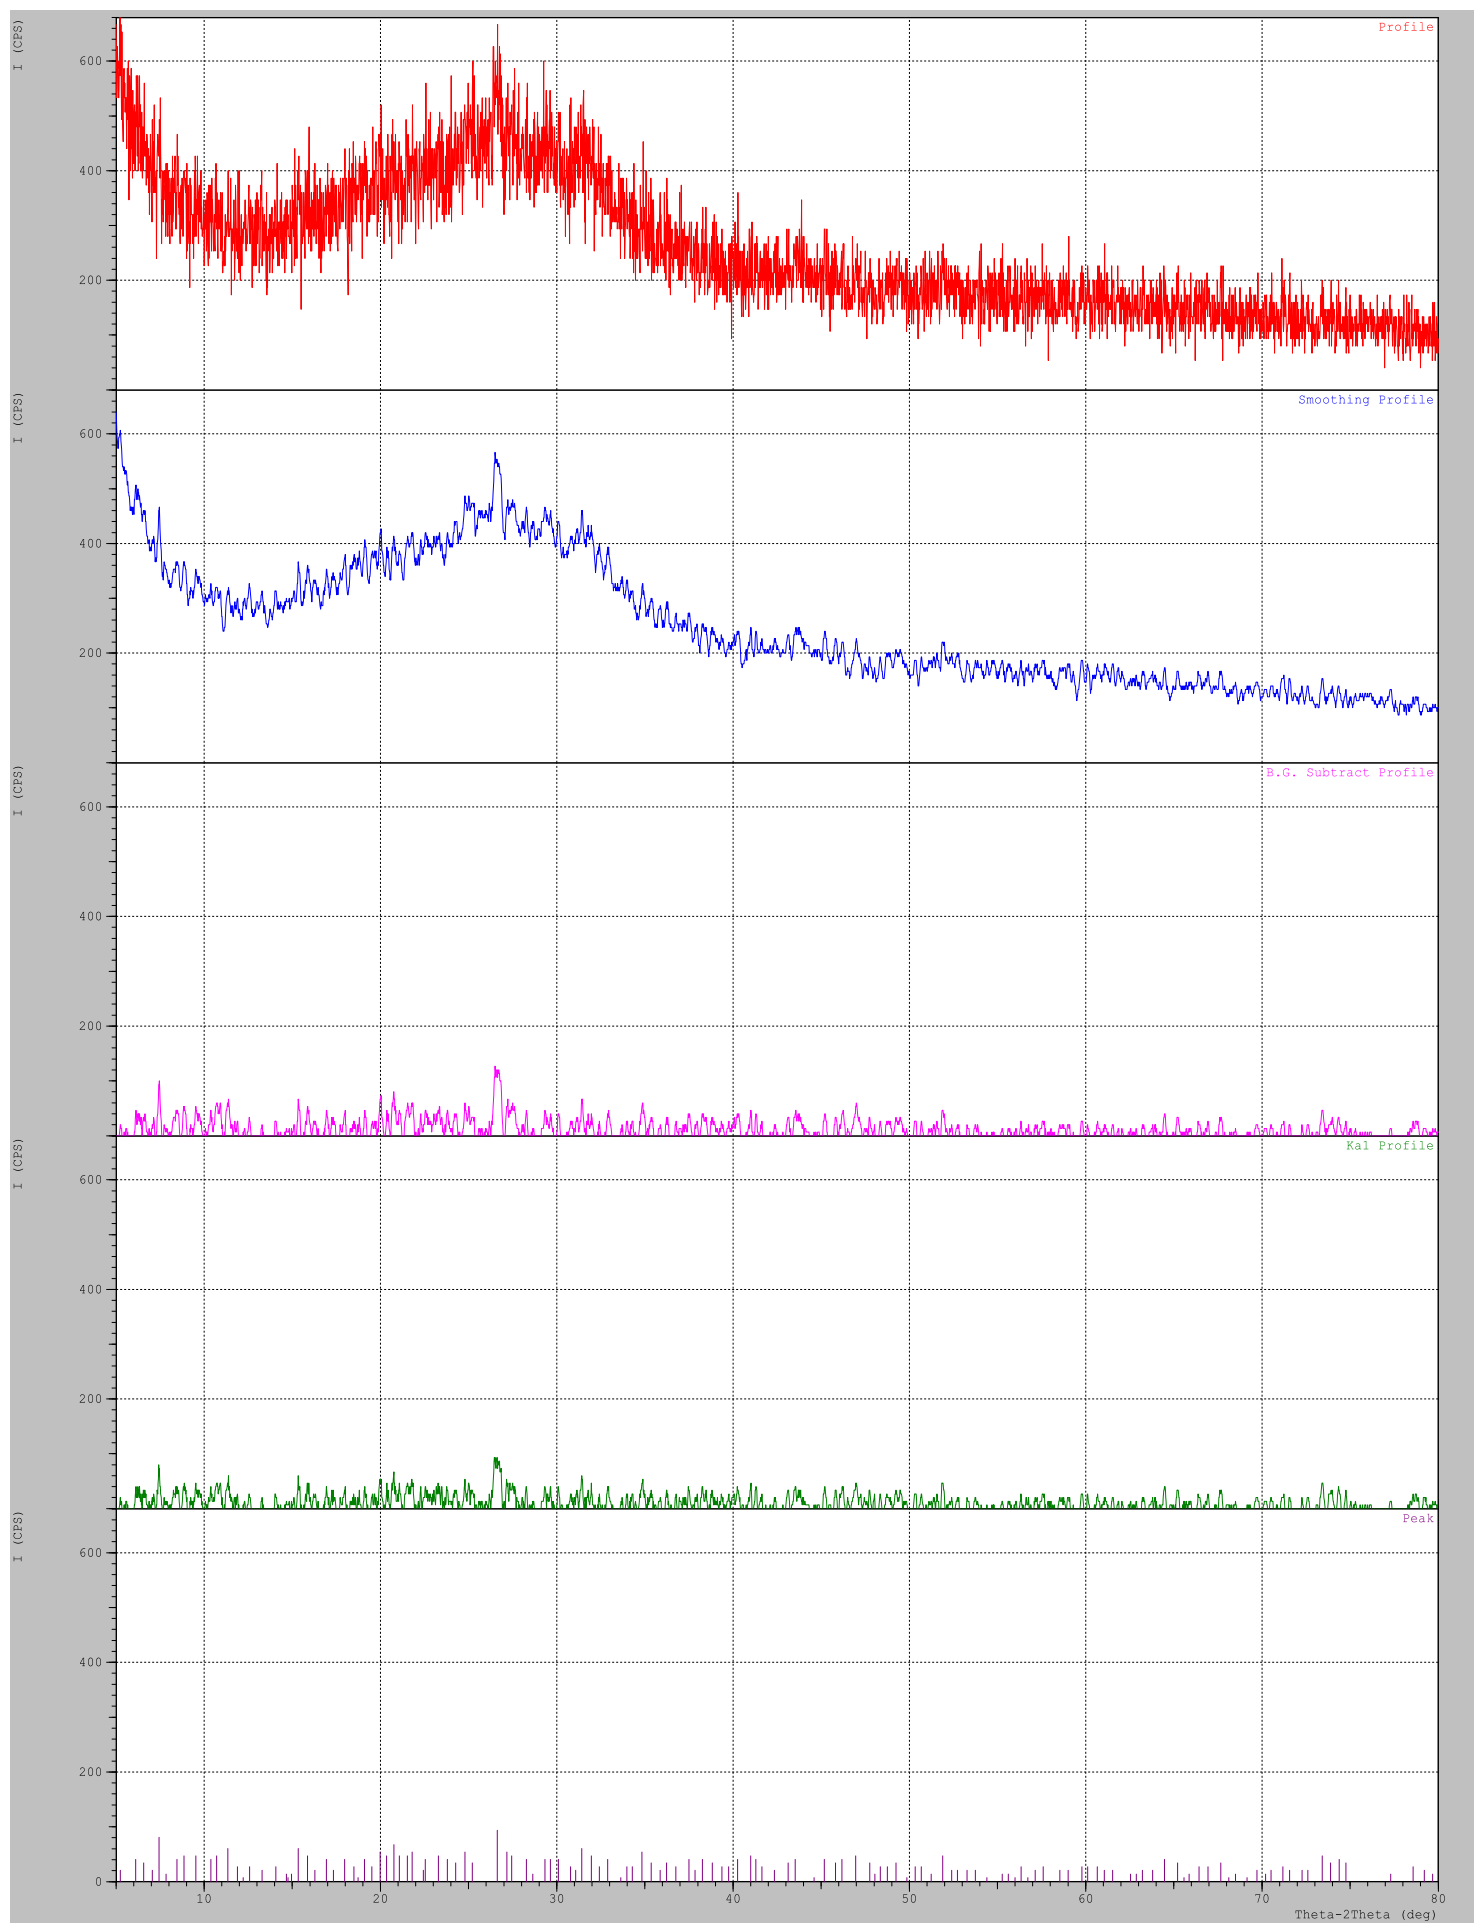

\*\*\* Basic Data Process \*\*\*

Group : 29-12-2021  
Data : Dr-abdelhamed-Sameh-4

# Strongest 3 peaks

| no. peak | 2Theta<br>(deg) | d<br>(A) | I/I1 | FWHM<br>(deg) | Intensity<br>(Counts) | Integrated Int<br>(Counts) |
|----------|-----------------|----------|------|---------------|-----------------------|----------------------------|
| 1 56     | 26.6583         | 3.34122  | 100  | 0.22330       | 13                    | 186                        |
| 2 74     | 32.3650         | 2.76393  | 77   | 0.09000       | 10                    | 56                         |
| 3 65     | 29.5666         | 3.01884  | 69   | 0.14670       | 9                     | 77                         |

# Peak Data List

| peak<br>no. | 2Theta<br>(deg) | d<br>(A) | I/I1 | FWHM<br>(deg) | Intensity<br>(Counts) | Integrated Int<br>(Counts) |
|-------------|-----------------|----------|------|---------------|-----------------------|----------------------------|
| 1           | 5.2400          | 16.85127 | 46   | 0.04000       | 6                     | 23                         |
| 2           | 5.4900          | 16.08445 | 69   | 0.18000       | 9                     | 107                        |
| 3           | 5.8350          | 15.13420 | 15   | 0.07000       | 2                     | 8                          |
| 4           | 6.0400          | 14.62099 | 8    | 0.00000       | 1                     | 0                          |
| 5           | 6.4700          | 13.65020 | 23   | 0.04000       | 3                     | 8                          |
| 6           | 6.9650          | 12.68116 | 15   | 0.05000       | 2                     | 6                          |
| 7           | 7.2600          | 12.16652 | 8    | 0.00000       | 1                     | 0                          |
| 8           | 8.1250          | 10.87309 | 15   | 0.03000       | 2                     | 5                          |
| 9           | 8.4250          | 10.48658 | 23   | 0.03000       | 3                     | 8                          |
| 10          | 9.0050          | 9.81241  | 38   | 0.09000       | 5                     | 40                         |
| 11          | 9.3450          | 9.45616  | 23   | 0.11000       | 3                     | 21                         |
| 12          | 9.4850          | 9.31690  | 46   | 0.15000       | 6                     | 53                         |
| 13          | 9.9250          | 8.90482  | 54   | 0.07000       | 7                     | 53                         |
| 14          | 10.3600         | 8.53188  | 15   | 0.12000       | 2                     | 18                         |
| 15          | 10.5550         | 8.37469  | 15   | 0.03000       | 2                     | 3                          |
| 16          | 10.8750         | 8.12897  | 46   | 0.13000       | 6                     | 55                         |
| 17          | 11.2633         | 7.84958  | 31   | 0.03330       | 4                     | 23                         |
| 18          | 11.6066         | 7.61816  | 54   | 0.09330       | 7                     | 47                         |
| 19          | 11.9100         | 7.42477  | 54   | 0.06000       | 7                     | 41                         |
| 20          | 12.0900         | 7.31463  | 23   | 0.06000       | 3                     | 15                         |
| 21          | 12.4050         | 7.12959  | 23   | 0.05000       | 3                     | 9                          |
| 22          | 12.8433         | 6.88724  | 54   | 0.11330       | 7                     | 66                         |
| 23          | 13.1866         | 6.70870  | 54   | 0.13330       | 7                     | 69                         |
| 24          | 13.7100         | 6.45374  | 23   | 0.06000       | 3                     | 31                         |
| 25          | 14.0700         | 6.28941  | 54   | 0.14000       | 7                     | 97                         |
| 26          | 14.3500         | 6.16732  | 38   | 0.06000       | 5                     | 28                         |
| 27          | 14.7700         | 5.99287  | 54   | 0.16000       | 7                     | 82                         |
| 28          | 15.1516         | 5.84279  | 38   | 0.04330       | 5                     | 24                         |
| 29          | 15.7100         | 5.63635  | 23   | 0.06000       | 3                     | 17                         |
| 30          | 16.1500         | 5.48376  | 31   | 0.10000       | 4                     | 31                         |
| 31          | 16.5766         | 5.34359  | 46   | 0.08670       | 6                     | 47                         |
| 32          | 17.0466         | 5.19730  | 31   | 0.05330       | 4                     | 14                         |
| 33          | 17.5566         | 5.04746  | 38   | 0.07330       | 5                     | 34                         |
| 34          | 17.8800         | 4.95688  | 15   | 0.04000       | 2                     | 5                          |
| 35          | 18.3500         | 4.83097  | 38   | 0.06000       | 5                     | 28                         |
| 36          | 18.6566         | 4.75226  | 38   | 0.07330       | 5                     | 33                         |
| 37          | 19.1350         | 4.63451  | 38   | 0.09000       | 5                     | 40                         |
| 38          | 19.4400         | 4.56248  | 15   | 0.06000       | 2                     | 9                          |
| 39          | 19.8250         | 4.47474  | 15   | 0.03000       | 2                     | 3                          |
| 40          | 20.1200         | 4.40979  | 15   | 0.04000       | 2                     | 5                          |
| 41          | 20.4900         | 4.33099  | 46   | 0.06000       | 6                     | 18                         |
| 42          | 20.6300         | 4.30192  | 38   | 0.12000       | 5                     | 38                         |
| 43          | 21.0350         | 4.21999  | 15   | 0.09000       | 2                     | 10                         |
| 44          | 21.2550         | 4.17681  | 15   | 0.03000       | 2                     | 4                          |
| 45          | 21.7400         | 4.08471  | 8    | 0.00000       | 1                     | 0                          |
| 46          | 22.4600         | 3.95537  | 15   | 0.08000       | 2                     | 11                         |
| 47          | 22.9250         | 3.87618  | 15   | 0.03000       | 2                     | 4                          |
| 48          | 23.3050         | 3.81383  | 38   | 0.09000       | 5                     | 37                         |
| 49          | 23.8100         | 3.73407  | 31   | 0.10000       | 4                     | 32                         |

| peak<br>no. | 2Theta<br>(deg) | d<br>(Å) | I/I1 | FWHM<br>(deg) | Intensity<br>(Counts) | Integrated Int<br>(Counts) |
|-------------|-----------------|----------|------|---------------|-----------------------|----------------------------|
| 50          | 24.0850         | 3.69206  | 15   | 0.03000       | 2                     | 6                          |
| 51          | 24.3850         | 3.64731  | 23   | 0.03000       | 3                     | 14                         |
| 52          | 24.8466         | 3.58058  | 38   | 0.09330       | 5                     | 39                         |
| 53          | 25.0633         | 3.55012  | 31   | 0.03330       | 4                     | 19                         |
| 54          | 25.4550         | 3.49637  | 46   | 0.11000       | 6                     | 43                         |
| 55          | 26.1600         | 3.40372  | 38   | 0.08000       | 5                     | 35                         |
| 56          | 26.6583         | 3.34122  | 100  | 0.22330       | 13                    | 186                        |
| 57          | 27.0200         | 3.29730  | 23   | 0.04000       | 3                     | 9                          |
| 58          | 27.6150         | 3.22760  | 31   | 0.07000       | 4                     | 16                         |
| 59          | 27.7600         | 3.21107  | 15   | 0.04000       | 2                     | 9                          |
| 60          | 28.0600         | 3.17741  | 46   | 0.08000       | 6                     | 35                         |
| 61          | 28.4650         | 3.13312  | 31   | 0.07000       | 4                     | 26                         |
| 62          | 28.6400         | 3.11437  | 1    | 0.00000       | 0                     | 0                          |
| 63          | 29.0500         | 3.07134  | 46   | 0.28000       | 6                     | 70                         |
| 64          | 29.2800         | 3.04774  | 62   | 0.14000       | 8                     | 54                         |
| 65          | 29.5666         | 3.01884  | 69   | 0.14670       | 9                     | 77                         |
| 66          | 29.9300         | 2.98301  | 38   | 0.06000       | 5                     | 26                         |
| 67          | 30.0833         | 2.96816  | 38   | 0.03330       | 5                     | 14                         |
| 68          | 30.3800         | 2.93984  | 54   | 0.08000       | 7                     | 36                         |
| 69          | 30.5800         | 2.92107  | 8    | 0.00000       | 1                     | 0                          |
| 70          | 30.7800         | 2.90254  | 31   | 0.05340       | 4                     | 15                         |
| 71          | 31.1000         | 2.87340  | 23   | 0.04000       | 3                     | 22                         |
| 72          | 31.7266         | 2.81807  | 46   | 0.09330       | 6                     | 49                         |
| 73          | 32.1600         | 2.78107  | 31   | 0.06660       | 4                     | 34                         |
| 74          | 32.3650         | 2.76393  | 77   | 0.09000       | 10                    | 56                         |
| 75          | 32.6200         | 2.74290  | 38   | 0.04000       | 5                     | 24                         |
| 76          | 32.9266         | 2.71806  | 38   | 0.05330       | 5                     | 20                         |
| 77          | 33.2175         | 2.69491  | 54   | 0.09500       | 7                     | 44                         |
| 78          | 33.5050         | 2.67244  | 23   | 0.03000       | 3                     | 11                         |
| 79          | 33.8100         | 2.64903  | 15   | 0.06000       | 2                     | 10                         |
| 80          | 34.0850         | 2.62828  | 15   | 0.03000       | 2                     | 7                          |
| 81          | 34.4800         | 2.59907  | 38   | 0.12000       | 5                     | 40                         |
| 82          | 34.7166         | 2.58190  | 31   | 0.16670       | 4                     | 35                         |
| 83          | 35.0700         | 2.55669  | 23   | 0.06000       | 3                     | 17                         |
| 84          | 35.5900         | 2.52051  | 31   | 0.14000       | 4                     | 35                         |
| 85          | 35.8633         | 2.50193  | 38   | 0.11330       | 5                     | 42                         |
| 86          | 36.1400         | 2.48341  | 46   | 0.12000       | 6                     | 42                         |
| 87          | 36.5550         | 2.45616  | 46   | 0.05000       | 6                     | 52                         |
| 88          | 37.1200         | 2.42006  | 31   | 0.08000       | 4                     | 36                         |
| 89          | 37.3200         | 2.40755  | 23   | 0.06000       | 3                     | 14                         |
| 90          | 37.6200         | 2.38904  | 15   | 0.04000       | 2                     | 11                         |
| 91          | 38.1666         | 2.35607  | 31   | 0.18670       | 4                     | 51                         |
| 92          | 39.0800         | 2.30308  | 31   | 0.04000       | 4                     | 22                         |
| 93          | 39.3400         | 2.28846  | 23   | 0.12000       | 3                     | 35                         |
| 94          | 39.6800         | 2.26963  | 8    | 0.00000       | 1                     | 0                          |
| 95          | 39.9450         | 2.25518  | 23   | 0.05000       | 3                     | 11                         |
| 96          | 40.2350         | 2.23959  | 15   | 0.03000       | 2                     | 3                          |
| 97          | 40.6200         | 2.21925  | 23   | 0.08000       | 3                     | 21                         |
| 98          | 41.4750         | 2.17545  | 38   | 0.07000       | 5                     | 31                         |
| 99          | 41.7800         | 2.16028  | 8    | 0.00000       | 1                     | 0                          |
| 100         | 42.0500         | 2.14703  | 15   | 0.06000       | 2                     | 12                         |
| 101         | 42.5400         | 2.12342  | 8    | 0.00000       | 1                     | 0                          |
| 102         | 43.0800         | 2.09805  | 23   | 0.04000       | 3                     | 18                         |
| 103         | 43.3250         | 2.08675  | 31   | 0.07000       | 4                     | 25                         |
| 104         | 43.5650         | 2.07581  | 31   | 0.13000       | 4                     | 26                         |
| 105         | 43.7900         | 2.06566  | 46   | 0.10000       | 6                     | 37                         |
| 106         | 44.3200         | 2.04218  | 15   | 0.00000       | 2                     | 0                          |
| 107         | 44.7500         | 2.02355  | 15   | 0.06000       | 2                     | 12                         |
| 108         | 45.0800         | 2.00950  | 15   | 0.08000       | 2                     | 15                         |
| 109         | 45.4450         | 1.99421  | 38   | 0.09000       | 5                     | 34                         |
| 110         | 45.6450         | 1.98594  | 31   | 0.07000       | 4                     | 28                         |
| 111         | 46.1700         | 1.96457  | 31   | 0.22000       | 4                     | 45                         |

| peak<br>no. | 2Theta<br>(deg) | d<br>(Å) | I/I1 | FWHM<br>(deg) | Intensity<br>(Counts) | Integrated Int<br>(Counts) |
|-------------|-----------------|----------|------|---------------|-----------------------|----------------------------|
| 112         | 46.4800         | 1.95219  | 31   | 0.08000       | 4                     | 22                         |
| 113         | 46.9250         | 1.93470  | 54   | 0.13000       | 7                     | 50                         |
| 114         | 47.2050         | 1.92388  | 38   | 0.15000       | 5                     | 53                         |
| 115         | 47.5850         | 1.90940  | 15   | 0.03000       | 2                     | 6                          |
| 116         | 47.9400         | 1.89608  | 8    | 0.00000       | 1                     | 0                          |
| 117         | 48.2750         | 1.88371  | 31   | 0.15000       | 4                     | 40                         |
| 118         | 48.5400         | 1.87404  | 8    | 0.00000       | 1                     | 0                          |
| 119         | 48.8600         | 1.86251  | 23   | 0.04000       | 3                     | 16                         |
| 120         | 49.1500         | 1.85220  | 15   | 0.06000       | 2                     | 12                         |
| 121         | 49.5800         | 1.83714  | 15   | 0.04000       | 2                     | 12                         |
| 122         | 49.9500         | 1.82439  | 15   | 0.06000       | 2                     | 11                         |
| 123         | 50.1300         | 1.81826  | 15   | 0.14000       | 2                     | 17                         |
| 124         | 50.5000         | 1.80581  | 23   | 0.04000       | 3                     | 13                         |
| 125         | 50.7666         | 1.79695  | 31   | 0.06670       | 4                     | 22                         |
| 126         | 50.9300         | 1.79156  | 46   | 0.10000       | 6                     | 52                         |
| 127         | 51.1200         | 1.78535  | 15   | 0.00000       | 2                     | 0                          |
| 128         | 51.5000         | 1.77307  | 38   | 0.08000       | 5                     | 56                         |
| 129         | 51.9050         | 1.76018  | 54   | 0.17000       | 7                     | 95                         |
| 130         | 52.2750         | 1.74859  | 46   | 0.17000       | 6                     | 50                         |
| 131         | 52.5850         | 1.73901  | 31   | 0.13000       | 4                     | 26                         |
| 132         | 52.9800         | 1.72697  | 8    | 0.00000       | 1                     | 0                          |
| 133         | 53.3200         | 1.71676  | 23   | 0.08000       | 3                     | 20                         |
| 134         | 53.5400         | 1.71022  | 15   | 0.04000       | 2                     | 8                          |
| 135         | 53.9050         | 1.69950  | 23   | 0.03000       | 3                     | 13                         |
| 136         | 54.5100         | 1.68206  | 23   | 0.06000       | 3                     | 15                         |
| 137         | 54.8450         | 1.67257  | 46   | 0.15000       | 6                     | 55                         |
| 138         | 55.2200         | 1.66210  | 23   | 0.04000       | 3                     | 13                         |
| 139         | 55.4600         | 1.65547  | 38   | 0.12000       | 5                     | 41                         |
| 140         | 55.7200         | 1.64836  | 8    | 0.00000       | 1                     | 0                          |
| 141         | 55.9900         | 1.64105  | 15   | 0.06000       | 2                     | 13                         |
| 142         | 56.4200         | 1.62956  | 23   | 0.08000       | 3                     | 23                         |
| 143         | 56.7900         | 1.61982  | 31   | 0.16000       | 4                     | 32                         |
| 144         | 57.0800         | 1.61227  | 31   | 0.12000       | 4                     | 23                         |
| 145         | 57.3300         | 1.60584  | 31   | 0.10000       | 4                     | 27                         |
| 146         | 57.5600         | 1.59997  | 31   | 0.08000       | 4                     | 23                         |
| 147         | 57.8200         | 1.59339  | 1    | 0.00000       | 0                     | 0                          |
| 148         | 57.9900         | 1.58912  | 15   | 0.04000       | 2                     | 5                          |
| 149         | 58.3100         | 1.58116  | 54   | 0.14000       | 7                     | 61                         |
| 150         | 58.7150         | 1.57122  | 46   | 0.23000       | 6                     | 62                         |
| 151         | 59.1200         | 1.56141  | 31   | 0.12000       | 4                     | 24                         |
| 152         | 59.4500         | 1.55353  | 31   | 0.10000       | 4                     | 38                         |
| 153         | 59.8450         | 1.54422  | 23   | 0.03000       | 3                     | 19                         |
| 154         | 60.1100         | 1.53804  | 15   | 0.06000       | 2                     | 8                          |
| 155         | 60.4000         | 1.53135  | 8    | 0.00000       | 1                     | 0                          |
| 156         | 60.8300         | 1.52155  | 15   | 0.06000       | 2                     | 7                          |
| 157         | 61.1400         | 1.51458  | 31   | 0.08000       | 4                     | 26                         |
| 158         | 61.7650         | 1.50074  | 31   | 0.11000       | 4                     | 29                         |
| 159         | 62.2300         | 1.49064  | 23   | 0.06000       | 3                     | 25                         |
| 160         | 62.4750         | 1.48538  | 15   | 0.11000       | 2                     | 16                         |
| 161         | 62.7150         | 1.48027  | 23   | 0.05000       | 3                     | 16                         |
| 162         | 63.3300         | 1.46737  | 23   | 0.10000       | 3                     | 29                         |
| 163         | 63.6950         | 1.45984  | 23   | 0.05000       | 3                     | 25                         |
| 164         | 64.0000         | 1.45362  | 38   | 0.08000       | 5                     | 34                         |
| 165         | 64.2300         | 1.44897  | 31   | 0.18000       | 4                     | 46                         |
| 166         | 64.5600         | 1.44235  | 8    | 0.00000       | 1                     | 0                          |
| 167         | 64.8700         | 1.43621  | 46   | 0.14000       | 6                     | 58                         |
| 168         | 65.2800         | 1.42818  | 31   | 0.12000       | 4                     | 36                         |
| 169         | 65.5900         | 1.42218  | 23   | 0.10000       | 3                     | 23                         |
| 170         | 65.9100         | 1.41604  | 38   | 0.10000       | 5                     | 29                         |
| 171         | 66.2500         | 1.40960  | 15   | 0.06000       | 2                     | 10                         |
| 172         | 66.5600         | 1.40378  | 23   | 0.04000       | 3                     | 15                         |
| 173         | 66.8100         | 1.39914  | 38   | 0.10000       | 5                     | 48                         |

| peak<br>no. | 2Theta<br>(deg) | d<br>(Å) | I/I1 | FWHM<br>(deg) | Intensity<br>(Counts) | Integrated Int<br>(Counts) |
|-------------|-----------------|----------|------|---------------|-----------------------|----------------------------|
| 174         | 67.1550         | 1.39279  | 23   | 0.03000       | 3                     | 9                          |
| 175         | 67.3800         | 1.38868  | 8    | 0.00000       | 1                     | 0                          |
| 176         | 67.7066         | 1.38277  | 54   | 0.09330       | 7                     | 55                         |
| 177         | 67.9600         | 1.37823  | 46   | 0.16000       | 6                     | 50                         |
| 178         | 68.4200         | 1.37009  | 31   | 0.20000       | 4                     | 40                         |
| 179         | 68.8300         | 1.36292  | 31   | 0.22000       | 4                     | 46                         |
| 180         | 69.2700         | 1.35534  | 31   | 0.06000       | 4                     | 28                         |
| 181         | 69.8000         | 1.34633  | 23   | 0.04000       | 3                     | 25                         |
| 182         | 70.2033         | 1.33959  | 31   | 0.11330       | 4                     | 36                         |
| 183         | 70.5300         | 1.33418  | 31   | 0.10000       | 4                     | 34                         |
| 184         | 70.8400         | 1.32910  | 31   | 0.12000       | 4                     | 38                         |
| 185         | 71.1600         | 1.32391  | 15   | 0.04000       | 2                     | 8                          |
| 186         | 71.4200         | 1.31972  | 23   | 0.08000       | 3                     | 23                         |
| 187         | 71.7400         | 1.31462  | 15   | 0.08000       | 2                     | 17                         |
| 188         | 71.9200         | 1.31177  | 8    | 0.00000       | 1                     | 0                          |
| 189         | 72.2000         | 1.30737  | 8    | 0.00000       | 1                     | 0                          |
| 190         | 72.9700         | 1.29547  | 23   | 0.14000       | 3                     | 26                         |
| 191         | 73.8600         | 1.28204  | 8    | 0.00000       | 1                     | 0                          |
| 192         | 74.1900         | 1.27715  | 23   | 0.10000       | 3                     | 30                         |
| 193         | 74.6300         | 1.27071  | 15   | 0.10000       | 2                     | 16                         |
| 194         | 74.8800         | 1.26709  | 1    | 0.00000       | 0                     | 0                          |
| 195         | 75.2200         | 1.26220  | 31   | 0.20000       | 4                     | 38                         |
| 196         | 75.5800         | 1.25708  | 1    | 0.00000       | 0                     | 0                          |
| 197         | 75.9350         | 1.25208  | 46   | 0.19000       | 6                     | 71                         |
| 198         | 76.3000         | 1.24700  | 15   | 0.04000       | 2                     | 6                          |
| 199         | 76.5750         | 1.24321  | 31   | 0.13000       | 4                     | 34                         |
| 200         | 76.9850         | 1.23760  | 31   | 0.17000       | 4                     | 40                         |
| 201         | 77.4300         | 1.23160  | 15   | 0.06000       | 2                     | 15                         |
| 202         | 77.9600         | 1.22455  | 23   | 0.12000       | 3                     | 26                         |
| 203         | 78.3200         | 1.21982  | 15   | 0.04000       | 2                     | 9                          |
| 204         | 78.9000         | 1.21230  | 15   | 0.04000       | 2                     | 6                          |
| 205         | 79.1200         | 1.20948  | 15   | 0.12000       | 2                     | 23                         |
| 206         | 79.4050         | 1.20585  | 15   | 0.03000       | 2                     | 6                          |

\*\*\* Basic Data Process \*\*\*

# Data Information

Group : 29-12-2021  
Data : Dr-abdelhamed-Sameh-4  
Sample Nmae : Dr-abdelhamed-Sameh4  
Comment :  
Date & Time : 12-29-21 12:14:05

# Measurement Condition

X-ray tube  
target : Cu  
voltage : 40.0 (kV)  
current : 30.0 (mA)  
Slits  
Auto Slit : not Used  
divergence slit : 1.00000 (deg)  
scatter slit : 1.00000 (deg)  
receiving slit : 0.30000 (mm)  
Scanning  
drive axis : Theta-2Theta  
scan range : 5.0000 - 80.0000 (deg)  
scan mode : Continuous Scan  
scan speed : 8.0000 (deg/min)  
sampling pitch : 0.0200 (deg)  
preset time : 0.15 (sec)

# Data Process Condition

Smoothing [ MANUAL ]  
smoothing points : 17  
B.G.Subtruction [ MANUAL ]  
sampling points : 19  
repeat times : 30  
Ka1-a2 Separate [ MANUAL ]  
Ka1 a2 ratio : 50 (%)  
Peak Search [ AUTO ]  
differential points : 13  
FWHM threshold : 0.050 (deg)  
intensity threshold : 30 (par mil)  
FWHM ratio (n-1)/n : 2  
System error Correction [ NO ]  
Precise peak Correction [ NO ]



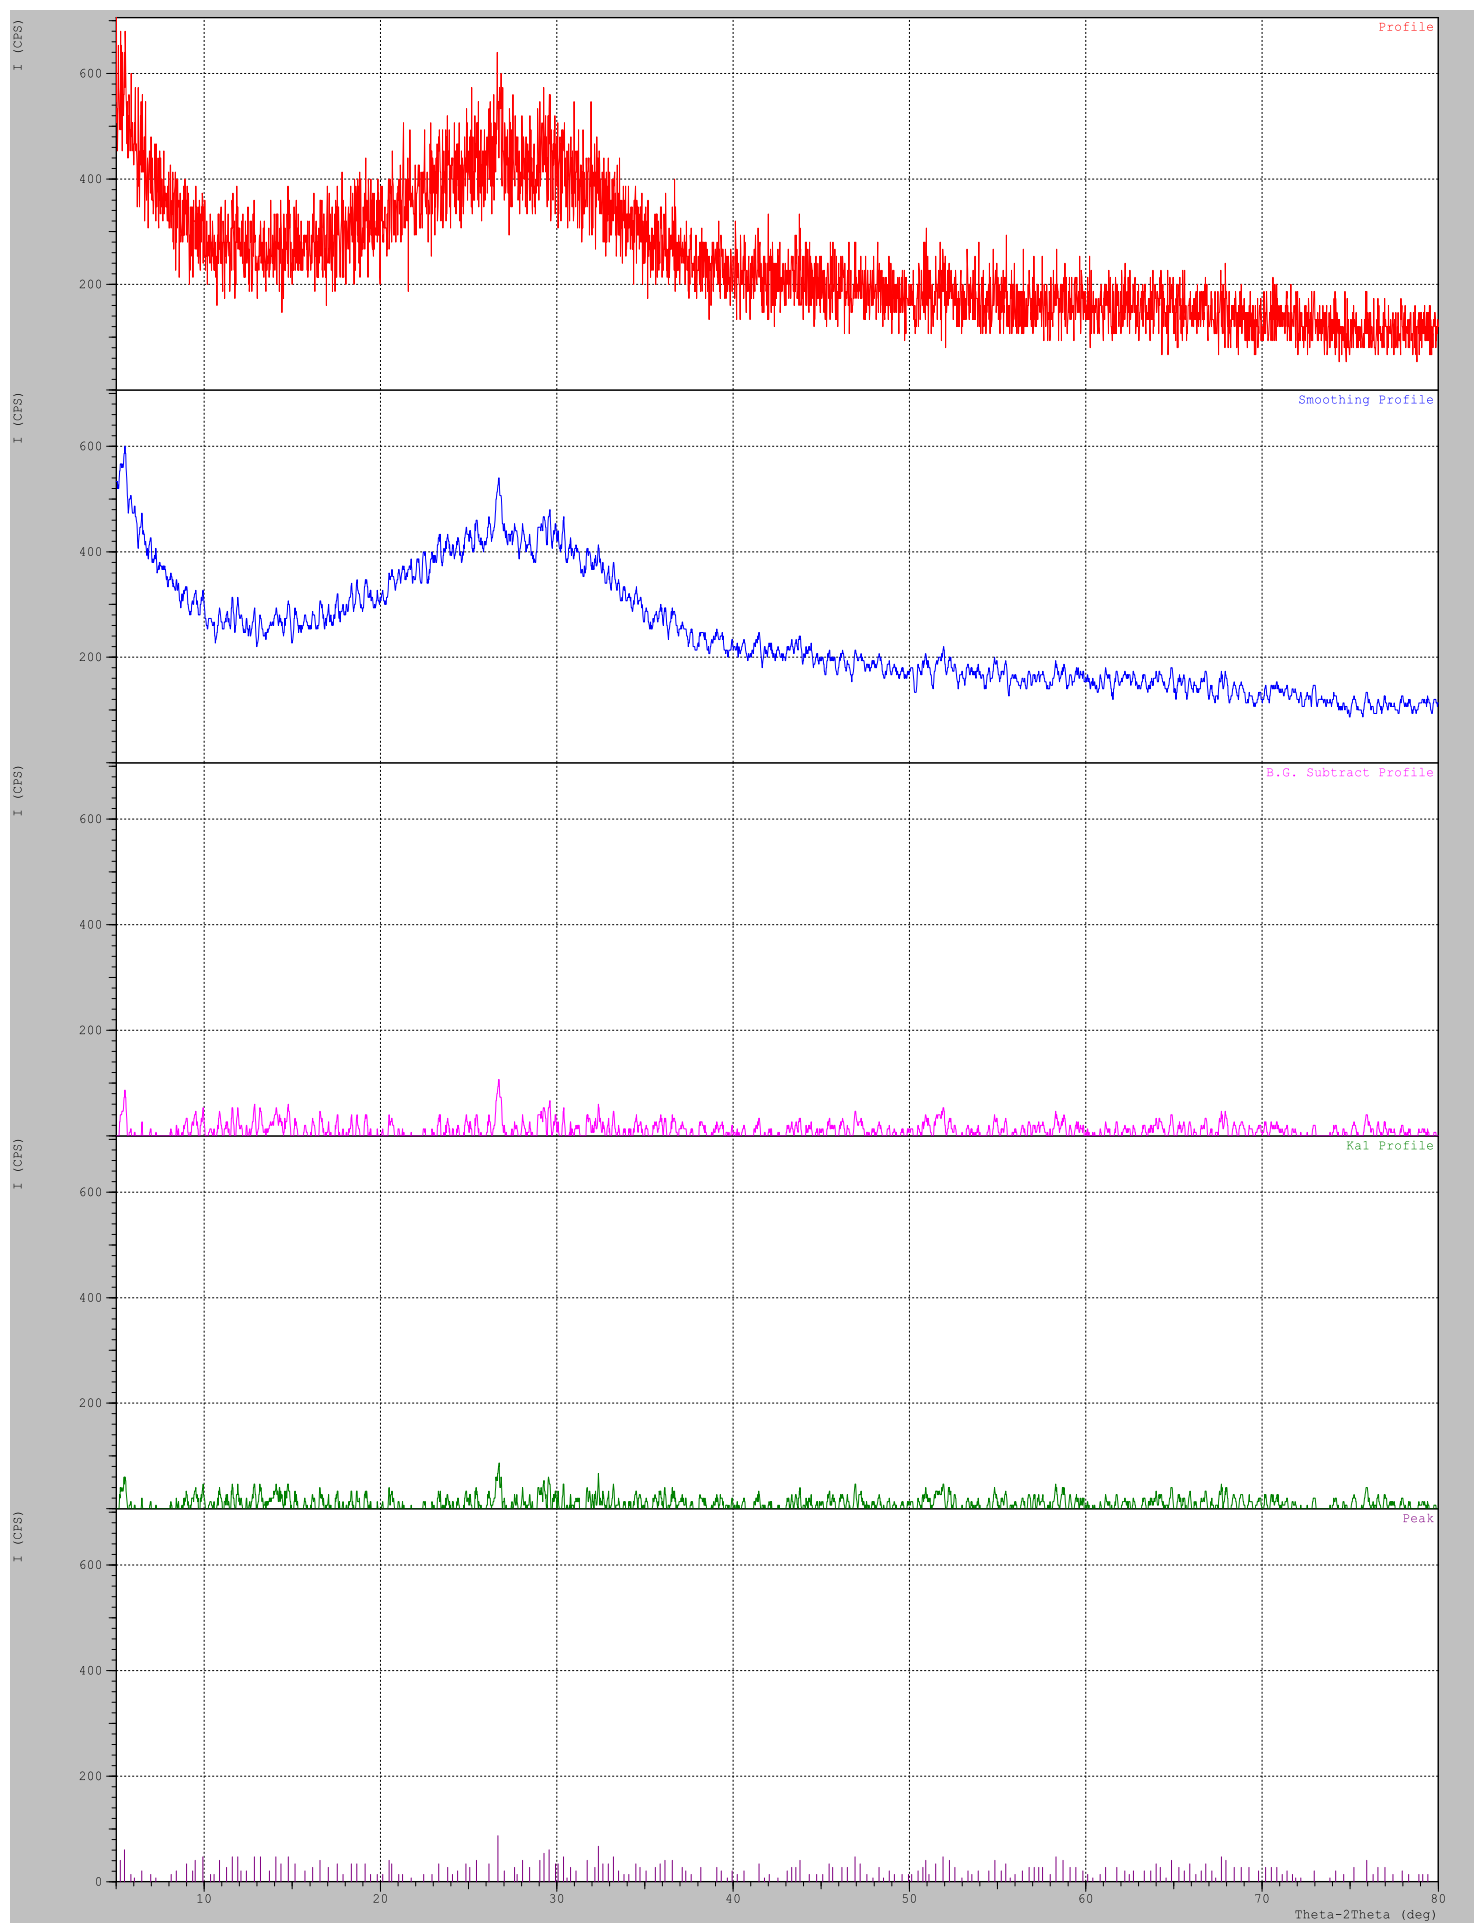

\*\*\* Basic Data Process \*\*\*

Group : 29-12-2021  
Data : Dr-abdelhamed-Sameh-5

# Strongest 3 peaks

| no. | peak | 2Theta  | d       | I/I1 | FWHM    | Intensity | Integrated Int |
|-----|------|---------|---------|------|---------|-----------|----------------|
|     | no.  | (deg)   | (Å)     |      | (deg)   | (Counts)  | (Counts)       |
| 1   | 52   | 26.3800 | 3.37583 | 100  | 0.16000 | 18        | 159            |
| 2   | 53   | 26.6200 | 3.34594 | 78   | 0.20000 | 14        | 160            |
| 3   | 59   | 29.6250 | 3.01303 | 78   | 0.17000 | 14        | 159            |

# Peak Data List

| peak | 2Theta  | d        | I/I1 | FWHM    | Intensity | Integrated Int |
|------|---------|----------|------|---------|-----------|----------------|
| no.  | (deg)   | (Å)      |      | (deg)   | (Counts)  | (Counts)       |
| 1    | 5.3533  | 16.49487 | 61   | 0.10670 | 11        | 85             |
| 2    | 5.6900  | 15.51954 | 11   | 0.08000 | 2         | 12             |
| 3    | 5.9700  | 14.79226 | 17   | 0.06000 | 3         | 17             |
| 4    | 6.4200  | 13.75640 | 17   | 0.02000 | 3         | 6              |
| 5    | 6.8550  | 12.88440 | 17   | 0.03000 | 3         | 6              |
| 6    | 7.2750  | 12.14147 | 11   | 0.03000 | 2         | 8              |
| 7    | 7.4400  | 11.87257 | 6    | 0.00000 | 1         | 0              |
| 8    | 7.5800  | 11.65360 | 6    | 0.00000 | 1         | 0              |
| 9    | 8.2600  | 10.69569 | 33   | 0.12000 | 6         | 46             |
| 10   | 8.6925  | 10.16446 | 39   | 0.17500 | 7         | 67             |
| 11   | 9.0433  | 9.77094  | 22   | 0.03330 | 4         | 10             |
| 12   | 9.3400  | 9.46121  | 6    | 0.00000 | 1         | 0              |
| 13   | 9.7950  | 9.02271  | 17   | 0.03000 | 3         | 12             |
| 14   | 10.3166 | 8.56767  | 17   | 0.04670 | 3         | 10             |
| 15   | 10.6000 | 8.33923  | 6    | 0.00000 | 1         | 0              |
| 16   | 10.9200 | 8.09557  | 17   | 0.04000 | 3         | 17             |
| 17   | 11.2150 | 7.88328  | 17   | 0.03000 | 3         | 10             |
| 18   | 11.6733 | 7.57478  | 28   | 0.05330 | 5         | 31             |
| 19   | 11.9900 | 7.37541  | 33   | 0.14000 | 6         | 55             |
| 20   | 12.6066 | 7.01602  | 22   | 0.09330 | 4         | 34             |
| 21   | 12.8700 | 6.87302  | 22   | 0.06000 | 4         | 21             |
| 22   | 13.1600 | 6.72220  | 17   | 0.04000 | 3         | 14             |
| 23   | 13.7800 | 6.42112  | 44   | 0.20000 | 8         | 117            |
| 24   | 14.3800 | 6.15452  | 6    | 0.00000 | 1         | 0              |
| 25   | 14.7766 | 5.99021  | 22   | 0.07330 | 4         | 37             |
| 26   | 15.0800 | 5.87037  | 28   | 0.04000 | 5         | 29             |
| 27   | 15.4450 | 5.73245  | 28   | 0.13000 | 5         | 61             |
| 28   | 15.7666 | 5.61624  | 28   | 0.10670 | 5         | 36             |
| 29   | 16.0950 | 5.50238  | 33   | 0.17000 | 6         | 52             |
| 30   | 16.7950 | 5.27459  | 17   | 0.03000 | 3         | 9              |
| 31   | 17.2950 | 5.12321  | 11   | 0.03000 | 2         | 3              |
| 32   | 17.7800 | 4.98454  | 17   | 0.04000 | 3         | 10             |
| 33   | 18.0250 | 4.91733  | 17   | 0.03000 | 3         | 16             |
| 34   | 18.4333 | 4.80932  | 44   | 0.21330 | 8         | 114            |
| 35   | 18.7900 | 4.71882  | 17   | 0.04000 | 3         | 14             |
| 36   | 19.3666 | 4.57961  | 44   | 0.22670 | 8         | 110            |
| 37   | 19.6200 | 4.52103  | 11   | 0.00000 | 2         | 0              |
| 38   | 19.9100 | 4.45583  | 22   | 0.14000 | 4         | 55             |
| 39   | 20.1900 | 4.39466  | 56   | 0.14000 | 10        | 109            |
| 40   | 20.7266 | 4.28208  | 22   | 0.13330 | 4         | 69             |
| 41   | 21.3000 | 4.16809  | 28   | 0.08000 | 5         | 62             |
| 42   | 21.7950 | 4.07453  | 28   | 0.07000 | 5         | 38             |
| 43   | 22.2966 | 3.98398  | 22   | 0.08670 | 4         | 49             |
| 44   | 22.6600 | 3.92091  | 17   | 0.04000 | 3         | 22             |
| 45   | 23.3500 | 3.80658  | 28   | 0.06000 | 5         | 38             |
| 46   | 23.8250 | 3.73175  | 28   | 0.07000 | 5         | 49             |
| 47   | 24.5600 | 3.62171  | 39   | 0.18000 | 7         | 92             |
| 48   | 24.8975 | 3.57338  | 33   | 0.03500 | 6         | 15             |
| 49   | 25.2150 | 3.52910  | 17   | 0.03000 | 3         | 7              |

| peak<br>no. | 2Theta<br>(deg) | d<br>(Å) | I/I1 | FWHM<br>(deg) | Intensity<br>(Counts) | Integrated Int<br>(Counts) |
|-------------|-----------------|----------|------|---------------|-----------------------|----------------------------|
| 50          | 25.5350         | 3.48559  | 17   | 0.05000       | 3                     | 10                         |
| 51          | 25.9500         | 3.43078  | 39   | 0.10000       | 7                     | 74                         |
| 52          | 26.3800         | 3.37583  | 100  | 0.16000       | 18                    | 159                        |
| 53          | 26.6200         | 3.34594  | 78   | 0.20000       | 14                    | 160                        |
| 54          | 26.9350         | 3.30752  | 33   | 0.15000       | 6                     | 63                         |
| 55          | 27.2766         | 3.26687  | 22   | 0.04670       | 4                     | 20                         |
| 56          | 27.8300         | 3.20315  | 44   | 0.08660       | 8                     | 72                         |
| 57          | 28.7350         | 3.10429  | 17   | 0.05000       | 3                     | 15                         |
| 58          | 29.2333         | 3.05250  | 67   | 0.30670       | 12                    | 164                        |
| 59          | 29.6250         | 3.01303  | 78   | 0.17000       | 14                    | 159                        |
| 60          | 30.1566         | 2.96111  | 22   | 0.07330       | 4                     | 17                         |
| 61          | 30.5800         | 2.92107  | 33   | 0.08000       | 6                     | 28                         |
| 62          | 30.8433         | 2.89673  | 33   | 0.20670       | 6                     | 73                         |
| 63          | 31.3675         | 2.84951  | 44   | 0.09500       | 8                     | 64                         |
| 64          | 31.6800         | 2.82211  | 67   | 0.12000       | 12                    | 134                        |
| 65          | 32.0550         | 2.78994  | 39   | 0.05000       | 7                     | 41                         |
| 66          | 32.5300         | 2.75028  | 28   | 0.14000       | 5                     | 68                         |
| 67          | 33.0250         | 2.71018  | 22   | 0.09000       | 4                     | 34                         |
| 68          | 33.2800         | 2.69000  | 11   | 0.04000       | 2                     | 15                         |
| 69          | 34.1900         | 2.62045  | 17   | 0.06000       | 3                     | 13                         |
| 70          | 34.6800         | 2.58454  | 6    | 0.00000       | 1                     | 0                          |
| 71          | 35.3800         | 2.53499  | 33   | 0.12000       | 6                     | 89                         |
| 72          | 35.9250         | 2.49778  | 33   | 0.11000       | 6                     | 47                         |
| 73          | 36.2200         | 2.47811  | 33   | 0.12000       | 6                     | 74                         |
| 74          | 36.7900         | 2.44101  | 22   | 0.06000       | 4                     | 33                         |
| 75          | 37.4800         | 2.39764  | 17   | 0.04000       | 3                     | 19                         |
| 76          | 38.1350         | 2.35795  | 22   | 0.07000       | 4                     | 19                         |
| 77          | 38.4800         | 2.33760  | 6    | 0.00000       | 1                     | 0                          |
| 78          | 38.8400         | 2.31676  | 11   | 0.04000       | 2                     | 4                          |
| 79          | 39.1200         | 2.30082  | 6    | 0.00000       | 1                     | 0                          |
| 80          | 39.5850         | 2.27486  | 11   | 0.03000       | 2                     | 6                          |
| 81          | 39.8600         | 2.25979  | 6    | 0.00000       | 1                     | 0                          |
| 82          | 40.3800         | 2.23188  | 17   | 0.08000       | 3                     | 15                         |
| 83          | 40.7400         | 2.21299  | 6    | 0.00000       | 1                     | 0                          |
| 84          | 41.0500         | 2.19699  | 11   | 0.06000       | 2                     | 14                         |
| 85          | 41.6050         | 2.16896  | 22   | 0.11000       | 4                     | 38                         |
| 86          | 42.0533         | 2.14687  | 39   | 0.10670       | 7                     | 46                         |
| 87          | 42.3100         | 2.13443  | 33   | 0.14000       | 6                     | 43                         |
| 88          | 42.6100         | 2.12010  | 28   | 0.14000       | 5                     | 59                         |
| 89          | 43.3000         | 2.08790  | 44   | 0.16000       | 8                     | 94                         |
| 90          | 43.8400         | 2.06342  | 33   | 0.28000       | 6                     | 125                        |
| 91          | 44.1350         | 2.05031  | 44   | 0.21000       | 8                     | 90                         |
| 92          | 44.4500         | 2.03651  | 28   | 0.06000       | 5                     | 26                         |
| 93          | 44.7350         | 2.02420  | 22   | 0.15000       | 4                     | 35                         |
| 94          | 44.9850         | 2.01353  | 28   | 0.11000       | 5                     | 35                         |
| 95          | 45.3800         | 1.99691  | 17   | 0.04000       | 3                     | 18                         |
| 96          | 45.9600         | 1.97306  | 17   | 0.04000       | 3                     | 17                         |
| 97          | 46.7000         | 1.94350  | 11   | 0.12000       | 2                     | 15                         |
| 98          | 46.9900         | 1.93218  | 22   | 0.14000       | 4                     | 35                         |
| 99          | 47.3400         | 1.91871  | 28   | 0.08000       | 5                     | 35                         |
| 100         | 47.5900         | 1.90921  | 22   | 0.10000       | 4                     | 23                         |
| 101         | 48.0100         | 1.89348  | 22   | 0.14000       | 4                     | 34                         |
| 102         | 48.3400         | 1.88133  | 17   | 0.12000       | 3                     | 21                         |
| 103         | 48.8600         | 1.86251  | 22   | 0.12000       | 4                     | 24                         |
| 104         | 49.1033         | 1.85385  | 33   | 0.11330       | 6                     | 42                         |
| 105         | 49.5000         | 1.83992  | 6    | 0.00000       | 1                     | 0                          |
| 106         | 50.2600         | 1.81386  | 22   | 0.04000       | 4                     | 21                         |
| 107         | 50.7650         | 1.79700  | 39   | 0.09000       | 7                     | 45                         |
| 108         | 51.0600         | 1.78731  | 22   | 0.04000       | 4                     | 21                         |
| 109         | 51.4000         | 1.77628  | 22   | 0.08000       | 4                     | 40                         |
| 110         | 51.9650         | 1.75829  | 44   | 0.21000       | 8                     | 122                        |
| 111         | 52.8600         | 1.73061  | 22   | 0.10000       | 4                     | 19                         |

| peak<br>no. | 2Theta<br>(deg) | d<br>(Å) | I/I1 | FWHM<br>(deg) | Intensity<br>(Counts) | Integrated Int<br>(Counts) |
|-------------|-----------------|----------|------|---------------|-----------------------|----------------------------|
| 112         | 53.1400         | 1.72215  | 17   | 0.04000       | 3                     | 14                         |
| 113         | 53.7800         | 1.70315  | 22   | 0.04000       | 4                     | 22                         |
| 114         | 54.3600         | 1.68634  | 11   | 0.04000       | 2                     | 12                         |
| 115         | 54.8100         | 1.67356  | 28   | 0.10000       | 5                     | 32                         |
| 116         | 55.1000         | 1.66543  | 11   | 0.04000       | 2                     | 8                          |
| 117         | 55.7250         | 1.64822  | 39   | 0.13000       | 7                     | 63                         |
| 118         | 56.0750         | 1.63876  | 11   | 0.11000       | 2                     | 17                         |
| 119         | 56.3800         | 1.63062  | 6    | 0.00000       | 1                     | 0                          |
| 120         | 57.4800         | 1.60200  | 17   | 0.10000       | 3                     | 30                         |
| 121         | 58.1150         | 1.58600  | 28   | 0.15000       | 5                     | 53                         |
| 122         | 58.3950         | 1.57906  | 17   | 0.05000       | 3                     | 13                         |
| 123         | 58.6600         | 1.57256  | 17   | 0.08000       | 3                     | 18                         |
| 124         | 58.9750         | 1.56491  | 22   | 0.09000       | 4                     | 20                         |
| 125         | 59.5750         | 1.55057  | 22   | 0.17000       | 4                     | 56                         |
| 126         | 60.1700         | 1.53665  | 22   | 0.14000       | 4                     | 29                         |
| 127         | 60.5100         | 1.52883  | 22   | 0.06000       | 4                     | 30                         |
| 128         | 61.0200         | 1.51727  | 28   | 0.08000       | 5                     | 38                         |
| 129         | 61.3633         | 1.50960  | 28   | 0.07330       | 5                     | 34                         |
| 130         | 61.8500         | 1.49888  | 28   | 0.14000       | 5                     | 52                         |
| 131         | 62.1850         | 1.49161  | 33   | 0.13000       | 6                     | 41                         |
| 132         | 62.5350         | 1.48410  | 17   | 0.07000       | 3                     | 16                         |
| 133         | 63.0600         | 1.47300  | 22   | 0.10000       | 4                     | 28                         |
| 134         | 63.4300         | 1.46530  | 11   | 0.06000       | 2                     | 10                         |
| 135         | 63.8600         | 1.45647  | 11   | 0.04000       | 2                     | 11                         |
| 136         | 64.2000         | 1.44957  | 17   | 0.06000       | 3                     | 12                         |
| 137         | 64.4800         | 1.44395  | 17   | 0.08000       | 3                     | 22                         |
| 138         | 64.8000         | 1.43759  | 17   | 0.04000       | 3                     | 12                         |
| 139         | 65.1100         | 1.43149  | 22   | 0.10000       | 4                     | 33                         |
| 140         | 65.6700         | 1.42064  | 28   | 0.14000       | 5                     | 52                         |
| 141         | 66.0000         | 1.41433  | 11   | 0.08000       | 2                     | 13                         |
| 142         | 66.2600         | 1.40941  | 11   | 0.04000       | 2                     | 6                          |
| 143         | 67.0200         | 1.39526  | 6    | 0.00000       | 1                     | 0                          |
| 144         | 67.8350         | 1.38047  | 17   | 0.03000       | 3                     | 12                         |
| 145         | 68.2150         | 1.37370  | 11   | 0.05000       | 2                     | 9                          |
| 146         | 68.6600         | 1.36588  | 11   | 0.04000       | 2                     | 9                          |
| 147         | 68.9300         | 1.36119  | 17   | 0.06000       | 3                     | 16                         |
| 148         | 69.2400         | 1.35585  | 6    | 0.00000       | 1                     | 0                          |
| 149         | 70.6600         | 1.33204  | 17   | 0.04000       | 3                     | 15                         |
| 150         | 70.9733         | 1.32693  | 22   | 0.13330       | 4                     | 28                         |
| 151         | 71.3200         | 1.32133  | 11   | 0.08000       | 2                     | 12                         |
| 152         | 71.6000         | 1.31685  | 11   | 0.08000       | 2                     | 18                         |
| 153         | 72.0200         | 1.31020  | 6    | 0.00000       | 1                     | 0                          |
| 154         | 72.6250         | 1.30077  | 17   | 0.03000       | 3                     | 17                         |
| 155         | 73.0000         | 1.29501  | 6    | 0.00000       | 1                     | 0                          |
| 156         | 73.8700         | 1.28189  | 17   | 0.06000       | 3                     | 15                         |
| 157         | 74.2200         | 1.27671  | 6    | 0.00000       | 1                     | 0                          |
| 158         | 74.7100         | 1.26955  | 17   | 0.06000       | 3                     | 21                         |
| 159         | 75.5650         | 1.25729  | 11   | 0.05000       | 2                     | 8                          |
| 160         | 75.9400         | 1.25201  | 6    | 0.00000       | 1                     | 0                          |
| 161         | 76.5800         | 1.24314  | 17   | 0.04000       | 3                     | 18                         |
| 162         | 76.9800         | 1.23767  | 22   | 0.08000       | 4                     | 31                         |
| 163         | 77.4350         | 1.23153  | 11   | 0.05000       | 2                     | 7                          |
| 164         | 78.0400         | 1.22349  | 11   | 0.04000       | 2                     | 9                          |
| 165         | 78.3400         | 1.21956  | 6    | 0.00000       | 1                     | 0                          |
| 166         | 78.7350         | 1.21442  | 17   | 0.07000       | 3                     | 23                         |
| 167         | 79.2400         | 1.20795  | 17   | 0.08000       | 3                     | 23                         |
| 168         | 79.5650         | 1.20383  | 22   | 0.17000       | 4                     | 44                         |

\*\*\* Basic Data Process \*\*\*

# Data Information

Group : 29-12-2021  
Data : Dr-abdelhamed-Sameh-5  
Sample Nmae : Dr-abdelhamed-Sameh5  
Comment :  
Date & Time : 12-29-21 12:33:27

# Measurement Condition

X-ray tube  
target : Cu  
voltage : 40.0 (kV)  
current : 30.0 (mA)  
Slits  
Auto Slit : not Used  
divergence slit : 1.00000 (deg)  
scatter slit : 1.00000 (deg)  
receiving slit : 0.30000 (mm)  
Scanning  
drive axis : Theta-2Theta  
scan range : 5.0000 - 80.0000 (deg)  
scan mode : Continuous Scan  
scan speed : 8.0000 (deg/min)  
sampling pitch : 0.0200 (deg)  
preset time : 0.15 (sec)

# Data Process Condition

Smoothing [ MANUAL ]  
smoothing points : 17  
B.G.Subtruction [ MANUAL ]  
sampling points : 19  
repeat times : 30  
Ka1-a2 Separate [ MANUAL ]  
Ka1 a2 ratio : 50 (%)  
Peak Search [ AUTO ]  
differential points : 21  
FWHM threshold : 0.050 (deg)  
intensity threshold : 30 (par mil)  
FWHM ratio (n-1)/n : 2  
System error Correction [ NO ]  
Precise peak Correction [ NO ]

< Group: 29-12-2021      Data: Dr-abdelhamed-Sameh-5   >

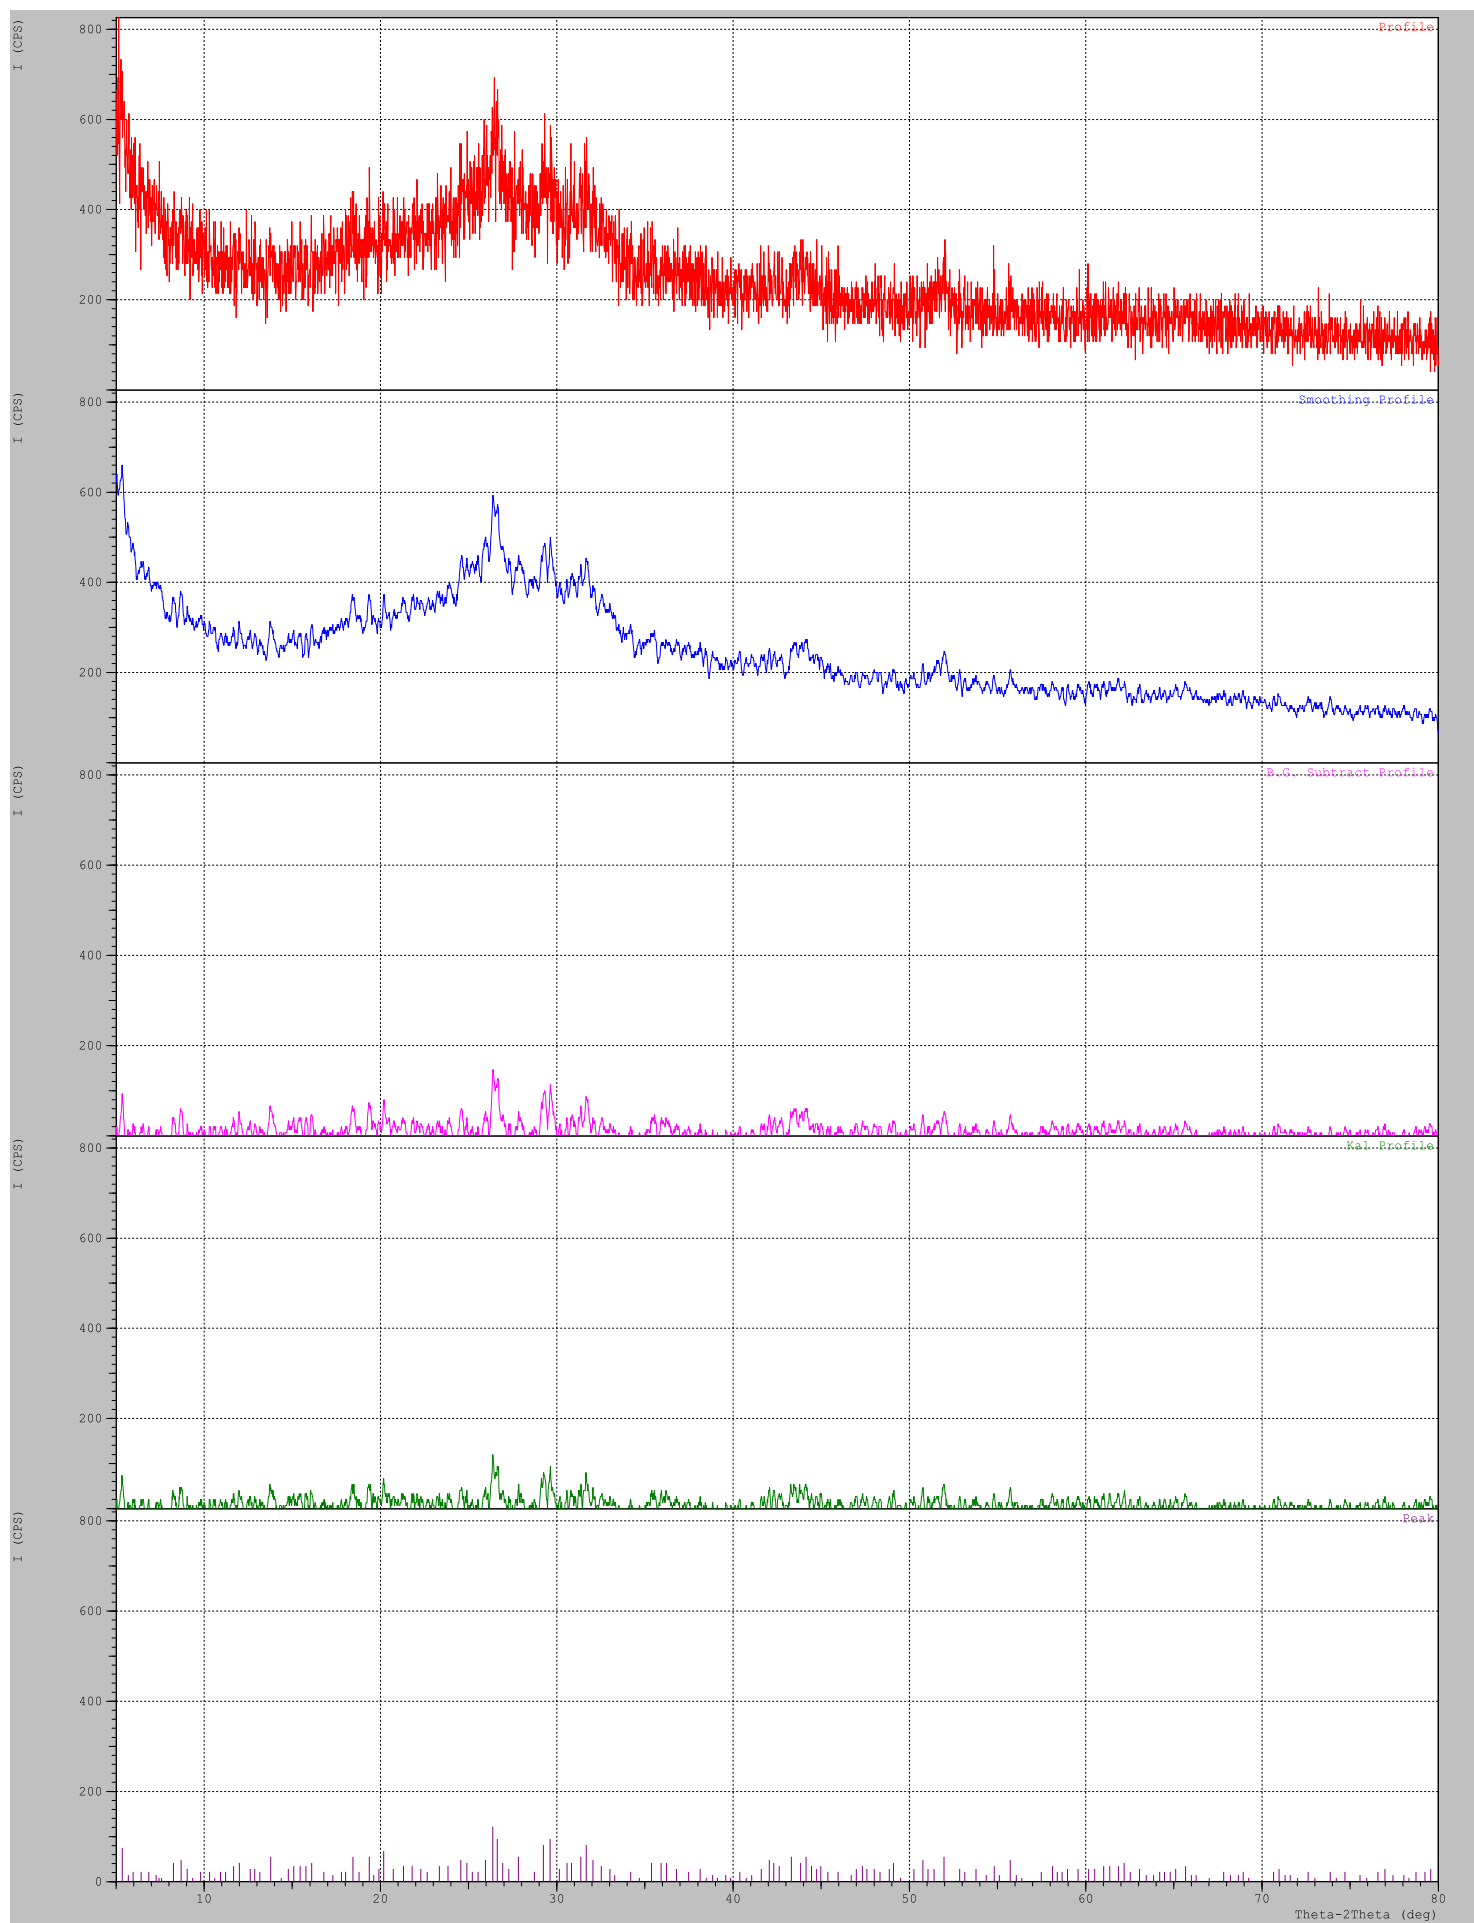

Supplement: s1 [file s1]
